# Supplementary material for: Genetic diversity and antimicrobial resistance of Salmonella serotypes recovered throughout the beef production chain and from patients with salmonellosis
Source: PeerJ. 2018 Aug 23;6:e5482. doi: 10.7717/peerj.5482 (PMC6109583; doi:10.7717/peerj.5482)
Supplement: Data S1 — File contains values for characters identified as binary (presence/absence) according to results from PFGE experiments and genetic analysis of the isolates. Columns correspond to number of informative characters. Lines correspond to each isolate analyzed. [file peerj-06-5482-s002.xlsx]

## Sheet: S. TYPHIMURIUM-28
Serotype	TYPHIMURIUM
BANDAS/CEPAS	1	2	3	4	5	6	7	8	9	10	11	12	13	14	15	16	17	18	19	20	21	22	23	24	25	26	27			CLSI antimicrobial resistance classes
>BRA																														FPI	Pen	Phen	Tet	Cephems		Quinolones		Aminoglycosides
1	0	1	0	0	1	0	1	0	1	0	1	0	0	1	0	1	0	1	0	1	0	1	0	0	1	0	0		Source	SXT	AMP	CHL	TET	CRO	CEP	CIP	NAL	GEN	KAN	STR
>C-1640																													G032	S	S	S	S	S	S	S		S	S		1
0	0	1	0	0	1	0	0	1	0	0	0	0	0	0	0	0	0	0	0	0	1	1	0	0	1	1	0		C2397		S			S	S	S			S		1
>C-1650																													C2388		S			S	S		S				1
0	0	1	0	0	1	0	0	1	0	0	0	0	0	0	0	0	0	0	0	0	1	1	0	0	1	1	0		C2350		S			S	S	S	S				1
>C-1673																													C2360		S			S	S		S				1
																													C2272		S			S	S				S		1
0	0	1	0	0	1	0	0	1	0	0	0	0	0	0	0	0	0	0	0	0	1	1	0	0	1	1	0		G15						S			S			1
>C-2272																													G71		S			S	S			S	S		1
0	0	1	0	1	0	0	0	0	1	0	0	0	0	1	0	0	0	1	0	1	1	1	0	0	0	0	0		G112		S			S	S			S	S		1
>C-2350																													G24	S							S		S		1
0	0	0	1	1	0	0	0	0	1	0	0	0	0	1	0	0	0	1	0	0	0	0	0	0	0	0	0		G140		S			S	S			S	S		1
>C-2360																													G84	S	S	S	S	S	S	S		S	S	S	1
0	0	0	1	1	0	0	0	0	1	0	0	0	0	1	0	0	0	1	0	0	0	0	0	0	0	0	0		G77	S	S	S	S								1
>C-2388																													H37559	S	S	S	S	S	S	S	S	S	S	S	1
0	0	0	1	1	0	0	0	0	1	0	0	0	0	1	0	0	0	1	0	0	0	0	0	0	0	0	0		C2504	S	S	S	S	S	S		S	S	S		1
>C-2397																													H334	S	S	S	S	S	S		S	S	S	S	1
0	0	0	1	1	0	0	0	0	1	0	0	0	0	1	0	0	0	1	0	0	0	0	0	0	0	0	0		H7										S		1
>C-2423																													H555		S	S		S	S	S	S	S	S	S	1
0	1	1	0	0	1	0	0	1	0	0	1	0	0	1	0	1	0	0	0	0	1	1	0	0	1	1	0		H44341					S	S			S	S		1
>C-2430																													H46603												1
0	1	1	0	0	1	0	0	1	0	0	1	0	0	1	0	1	0	0	0	0	1	1	0	0	1	1	0		C2598		S			S	S	S	S				1
>C-2540																													C2568		S			S	S		S				1
0	1	1	0	0	1	0	0	1	0	0	1	0	0	1	0	1	0	0	0	0	1	1	0	0	1	1	0		C2540		S			S	S		S				1
>C-2568																													C2423		S			S	S		S				1
0	1	1	0	0	1	0	0	1	0	0	1	0	0	1	0	1	0	0	0	0	1	1	0	0	1	1	0		C2430		S			S	S		S				1
>C-2598																													C1673		S			S	S				S		1
0	1	1	0	0	1	0	0	1	0	0	1	0	0	1	0	1	0	0	0	0	0	0	0	0	1	1	0		C1640		S			S	S				S		1
>C-2504																													C1650		S			S	S				S		1
1	0	1	0	0	1	0	1	1	0	0	0	1	0	0	0	1	0	0	0	0	0	1	0	0	0	1	0
>M-71																																									28
1	0	1	0	0	0	0	1	0	1	1	0	0	1	1	0	1	0	0	0	0	1	0	0	0	1	1	0				R
>M-24																															I
0	0	1	1	0	1	0	0	1	0	0	1	1	0	0	0	0	0	0	0	1	1	0	0	0	1	0	0				S
>M-112
0	0	0	0	0	0	0	0	0	0	0	0	0	0	1	0	0	0	0	0	0	1	0	0	0	1	0	0
>M-140
0	0	1	0	0	1	0	0	0	0	0	0	1	0	1	0	0	1	0	1	0	0	1	0	0	1	0	0
>M-15
0	0	1	0	0	0	0	0	0	1	0	1	1	1	1	0	0	0	1	0	1	1	1	0	0	0	0	1
>M-32
1	0	1	1	0	0	1	1	0	0	1	1	0	0	1	0	0	0	1	0	1	0	1	0	0	0	0	0
>M-77
0	0	0	0	0	0	0	0	0	0	0	0	1	0	1	0	1	0	1	0	1	0	1	0	0	1	1	0
>M-84
0	0	1	1	0	1	0	1	0	0	0	1	0	0	1	0	0	0	0	1	0	1	1	1	1	0	0	0
>D.37559
0	0	1	1	0	0	0	0	1	0	0	0	0	0	1	0	1	0	1	0	0	0	1	0	0	0	1	0
>D.44341
0	0	1	0	0	1	0	0	1	0	0	1	0	0	1	0	0	0	0	0	0	0	1	0	0	1	1	1
>D.46603
0	0	0	0	0	1	0	0	1	0	0	1	0	0	1	0	0	0	0	0	1	0	1	0	0	1	1	1
>D.334
1	0	1	0	0	1	0	0	1	0	0	1	0	0	1	0	0	0	0	0	0	0	1	0	0	1	0	0
>D.555
0	0	1	0	0	1	0	0	1	0	0	1	0	0	1	0	0	0	0	0	0	0	1	0	0	0	1	0
>D.7
0	0	1	0	0	1	0	1	1	0	0	1	1	0	1	1	0	0	0	0	0	0	1	0	0	1	1	1
TREE
(((((((((C1640:-0.000,C1650:-0.000):0.000,C1673:-0.000):17.707,((((C2423:0.000,C2430:0.000):0.000,C2540:0.000):0.000,C2568:0.000):6.209,C2598:6.209):11.498):1.298,((((D44341:7.118,D46603:7.118):4.018,D555:11.136):2.238,D7:13.374):2.580,D334:15.954):3.051):6.163,C2504:25.168):5.403,(M77:23.295,D37559:23.295):7.276):5.568,(M24:33.063,(M140:30.180,M84:30.180):2.883):3.076):3.402,(M71:26.799,M112:26.…

## Sheet: Infantis-19
Serotype	INFANTIS
BANDAS/CEPAS	1	2	3	4	5	6	7	8	9	10	11	12	13	14	15	16	17	18	19	20	21	22	23	24	25	26	27							CLSI antimicrobial resistance classes
>BRA																																		FPI	Pen	Phen	Tet	Cephems		Quinolones		Aminoglycosides
1	0	1	0	0	1	0	1	0	1	0	1	0	0	1	0	1	0	1	0	1	0	1	0	0	1	0	0						Source	SXT	AMP	CHL	TET	CRO	CEP	CIP	NAL	GEN	KAN	STR
>C-2483																																	G153	S	S	S	S	S	S	S	S	S	S	S	1
1	0	0	0	0	0	0	1	0	1	0	1	0	0	1	0	1	0	1	0	1	0	1	1	0	1	1	0						G031	S	S	S	S	S	S	I	S	S	S	I	1
>C-1945																																	G215	S	S	S	S	S	S	S	S	S	S	S	1
0	0	0	0	0	0	0	1	1	1	0	1	1	0	1	0	1	0	1	0	0	0	1	0	0	1	1	0						G019	S	S	S	R	I	I	I	S	S	S	R	1
>C-2000																																	G180	S	S	S	S	S	S	S	S	S	S	S	1
0	0	0	0	0	0	0	1	1	1	0	1	1	0	1	0	1	0	1	0	0	0	1	0	0	0	1	0						G169	S	S	S	R	S	S	I	S	S	S	R	1
>C-1993																																	G040	S	S	S	S	I	S	I	S	S	S	S	1
1	0	0	0	0	0	0	1	0	1	0	1	1	0	1	0	1	0	1	0	0	0	0	1	0	1	1	0						H39623	S	S	S	S	S	S	I	S	S	S	S	1
>C-2039																																	H8	S	S	S	S	S	S	S	S	S	S	S	1
1	0	0	0	0	0	0	1	0	1	0	1	1	0	1	0	1	0	1	0	0	0	0	1	0	1	1	0						C2000	S	S	S	R	S	S	I	S	S	I	R	1
>C-2306																																	C2012	S	S	S	R	S	S	I	S	S	S	R	1
1	0	0	0	0	0	0	1	0	1	0	1	1	0	1	0	1	0	1	0	0	0	1	1	0	1	1	0						C1945	S	S	S	R	S	S	I	S	S	S	R	1
>C-1961																																	C1961	S	S	S	R	S	S	I	S	S	S	R	1
1	0	0	0	0	0	0	1	1	1	0	1	1	0	1	0	1	0	1	0	0	0	1	0	0	1	1	0						C2483	R	S	R	R	I	S	I	S	R	I	R	1
>M-169																																	G078	S	S	S	R	S	S	I	S	S	S	R	1
1	0	1	0	0	0	0	1	1	1	0	1	0	0	1	0	0	0	1	0	0	1	1	0	0	1	0	0						G079	S	S	S	R	S	S	S	S	S	S	R	1
>M-180																																	C2306	S	S	S	R	S	S	I	S	S	S	R	1
1	0	0	0	0	0	0	1	0	1	0	1	0	1	0	0	0	0	1	1	0	1	1	0	0	1	0	0						C1993	S	S	S	R	S	S	S	S	S	S	R	1
>M-215																																	C2039	S	S	S	R	S	S	I	S	S	S	R	1
1	0	0	0	0	0	0	1	1	1	0	1	0	0	1	0	0	1	1	0	0	0	1	0	1	1	1	0																		19
>M-153
1	1	0	0	0	0	0	0	0	1	0	0	0	0	1	0	0	0	1	1	1	0	0	0	0	0	0	0
>M-31
1	0	0	0	0	1	1	1	0	0	1	1	0	0	1	0	0	0	1	0	1	0	1	0	0	0	0	0
>M-40
1	0	0	0	0	0	0	1	1	1	0	1	0	0	1	0	0	0	0	0	0	1	1	0	0	1	0	0
>M-78
1	0	0	0	0	0	0	1	0	1	0	1	1	0	1	0	1	0	1	0	0	0	1	1	0	1	0	0
>M-79
1	0	0	0	0	0	0	1	0	1	0	1	1	0	1	0	1	0	1	0	0	0	1	1	0	1	0	0
>M-19
1	0	0	0	0	0	0	0	1	1	0	0	0	0	0	0	0	0	1	0	0	0	1	0	0	1	1	0
>D.8
1	0	0	1	0	1	0	1	1	1	0	1	0	0	1	0	1	0	1	0	0	0	1	0	0	1	1	0
>D.39623
1	0	0	0	0	1	0	1	0	1	0	1	1	0	1	0	1	0	0	0	1	0	1	0	0	1	0	0
>C-2012
0	0	0	0	0	0	0	1	1	1	0	1	1	0	1	0	1	0	1	0	0	0	1	0	0	0	1	0
TREE
((((((C2483:8.210,(((C1993:0.000,C2039:0.000):2.933,C2306:2.933):1.639,(M78:0.000,M79:0.000):4.573):3.637):6.600,(((C1945:2.933,C1961:2.933):1.544,(C2000:0.000,C2012:0.000):4.478):7.745,D8:12.222):2.588):1.850,D39623:16.660):8.014,(((M169:6.209,M40:6.209):10.268,M180:16.478):5.081,(M215:14.731,M19:14.731):6.827):3.115):4.837,M31:29.510):4.291,M153:33.801);

## Sheet: Anatum-17
Serotype	ANATUM
																														CLSI antimicrobial resistance classes
BANDAS/CEPAS	1	2	3	4	5	6	7	8	9	10	11	12	13	14	15	16	17	18	19	20	21	22	23	24	25	26	27			FPI	Pen	Phen	Tet	Cephems		Quinolones		Aminoglycosides
>BRA																													Source	SXT	AMP	CHL	TET	CRO	CEP	CIP	NAL	GEN	KAN	STR
1	0	1	0	0	1	0	1	0	1	0	1	0	0	1	0	1	0	1	0	1	0	1	0	0	1	0	0		G226	S	S	S	S	S	S	I	S	S	S	S	1
>C-745																													C1260	S	S	S	S	S	S	I	S	S	I	I	1
1	0	1	0	1	1	0	0	0	0	0	0	1	0	0	0	0	0	1	0	0	0	1	0	0	0	1	0		G164	R	R	R	R	R	R	I	I	R	S	R	1
>C-1528																													G058	S	S	R	R	S	I	I	R	S	S	R	1
1	0	1	0	0	1	1	1	1	0	0	0	1	0	1	0	0	0	1	0	0	1	1	1	0	0	1	0		G072	R	R	R	R	R	R	S	I	R	S	R	1
>C-920																													G236	S	S	S	S	S	S	S	S	S	S	S	1
1	0	1	1	0	0	0	1	0	0	0	1	0	1	0	0	0	0	1	0	0	1	0	0	0	1	1	0		G170	S	S	R	S	S	S	I	R	S	S	S	1
>C-1260																													G035	S	S	S	S	S	I	S	S	S	S	S	1
1	0	0	0	1	0	0	1	0	0	0	1	0	0	1	0	0	0	0	0	0	1	1	0	0	0	0	0		G090	S	S	S	S	S	S	S	S	S	S	S	1
>M-90																													G052	R	S	R	R	S	S	I	I	S	S	R	1
1	0	1	0	0	1	0	1	1	1	0	1	0	0	0	0	1	0	1	0	1	0	0	1	0	1	0	0		C920	S	S	S	S	S	S	S	S	S	S	S	1
>M-226																													H12	S	S	S	S	S	S	S	S	S	S	S	1
1	0	0	1	0	1	0	0	0	1	1	1	0	0	1	0	1	0	1	0	0	1	0	0	0	0	0	0		G221	S	S	S	S	S	S	S	S	S	S	S	1
>M-236																													C745	S	S	S	S	S	S	S	S	S	S	I	1
1	0	0	1	0	0	0	1	0	1	0	1	0	0	1	0	1	1	0	0	1	0	1	0	0	1	1	0		C1528	S	S	S	R	S	S	I	S	S	I	I	1
>M-35																																									15
0	0	1	0	0	0	0	0	0	0	0	0	0	0	0	0	0	0	1	0	1	0	1	0	0	0	0	0
>M-58
0	0	1	0	0	0	0	1	1	1	0	1	1	0	1	0	1	0	1	0	1	0	1	0	0	1	0	0
>M-72
0	1	1	0	0	0	0	1	1	1	0	1	1	0	1	0	1	0	1	0	1	0	1	0	0	1	0	1
>M-170
1	1	0	1	0	1	0	1	0	1	0	1	1	0	0	0	1	1	0	0	0	1	1	0	0	1	0	0
>M-52
1	0	1	0	0	0	0	1	1	0	0	1	0	0	0	1	0	1	1	0	0	1	0	1	0	1	0	0
>M-164
1	1	0	0	0	0	0	1	1	0	0	1	1	0	1	1	1	0	0	0	1	0	1	0	0	1	0	1
>M-221
1	0	1	0	0	0	0	0	0	0	0	0	1	0	1	0	1	0	0	0	0	0	1	0	0	1	1	0
>D.12
1	0	1	0	0	0	0	1	0	0	0	0	1	0	0	0	0	0	1	0	0	0	0	0	0	1	1	0
TREE
(((((C745:20.483,C1528:20.483):4.713,M221:25.196):8.090,((C920:17.602,D12:17.602):9.720,(M90:21.081,M52:21.081):6.241):5.964):2.599,M35:35.885):6.387,((C1260:31.949,((M236:20.077,M170:20.077):7.600,((M58:5.334,M72:5.334):11.575,M164:16.908):10.768):4.272):2.046,M226:33.995):8.277);
STRAINS WITHOUT PULSOTYPE
M-57
M-67
																																										Cepas sin Pulsotipo
																																										S. Anatum	120	057M5	Carne de bovino molida (carniceria)	Tlaq	R	R	S
																																										S. Anatum	145	067M6	Carne de bovino molida (carniceria)	Tlaq	S	R	S
[truncated: 4 more columns]

## Sheet: Montevideo-5
Serotype	MONTEVIDEO																														CLSI antimicrobial resistance classes
																															FPI	Pen	Phen	Tet	Cephems		Quinolones		Aminoglycosides
BANDAS/CEPAS	1	2	3	4	5	6	7	8	9	10	11	12	13	14	15	16	17	18	19	20	21	22	23	24	25	26	27			Source	SXT	AMP	CHL	TET	CRO	CEP	CIP	NAL	GEN	KAN	STR
>BRA																														>C-110	S	S	S	S	S	S	S	S	S	S	S
1	0	1	0	0	1	0	1	0	1	0	1	0	0	1	0	1	0	1	0	1	0	1	0	0	1	0	0			>C-1796	S	S	S	S	I	S	I	S	S	I	S
>C-1796																														>C-731	S	S	S	S	S	S	S	S	S	S	S
1	0	0	0	0	1	0	0	0	1	0	1	1	0	1	0	1	0	1	0	1	0	1	0	0	1	0	0			>D.1686	S	S	S	S	S	S	S	S	S	S	S
>C-731																														>M-193	S	S	S	S	I	S	S	S	S	S	S
0	1	0	0	0	1	0	1	0	0	0	1	1	1	1	1	0	0	1	0	0	1	1	0	0	1	1	0
>C-110
1	0	0	0	0	1	0	0	0	0	0	1	1	1	1	1	1	0	1	0	0	0	1	1	0	0	1	0
>M-193
1	0	0	0	0	0	0	0	0	1	0	1	1	1	0	0	1	0	1	0	1	0	0	0	0	1	0	0
>D.1686
0	0	1	0	0	1	0	0	1	0	0	1	0	0	1	0	0	0	0	0	0	0	1	0	0	0	1	0
TREE
(((C1796:12.859,M193:12.859):15.871,(C731:20.077,C110:20.077):8.654):8.342,D1686:37.073);
