# Supplementary material for: Genetic diversity and antimicrobial resistance of Salmonella serotypes recovered throughout the beef production chain and from patients with salmonellosis
Source: PeerJ. 2018 Aug 23;6:e5482. doi: 10.7717/peerj.5482 (PMC6109583; doi:10.7717/peerj.5482)
Supplement: Supplemental Information 1 — Final dataset [file peerj-06-5482-s001.xlsx]

## Sheet: Datos crudos
	CEPA	CLAVE	MUNICIPIO	AMPICILINA (AM)	TETRACICLINA (TE)	ÁCIDO NALIDIXICO (NA)	SULFA C/TRIM (SXT)	CIPROFLOXAXI (CIP)	CEFALOTINA (CF)	CEFTRIAXONA (CRO)	KANAMICINA (K)	STREPTOMICINA (S)	GENTAMICINA (GM)	CLORANFENICOL ©
	011a	011 M1	Tlaq	20	19	20	19	27	20	25	21	16	19	21
	19axt	019M2	Zap	20	0	22	17	24	17	23	18	8	18	20
	29a	029M3	Zap	0	0	14	11	28	16	25	22	0	19	17
	006a	006M1	Zap	22	0	23	24	32	20	26	20	11	20	23
	012a	012M1	GDL	25	20	26	24	32	24	25	24	18	22	23
	27a	027M3	Zap	24	19	25	24	34	22	36	21	17	21	24
	16a	016M2	Zap	20	0	20	0	30	17	24	21	14	20	21
	0019	001M1	Zap	22	0	22	17	28	17	22	19	10	18	22
	02b	002M1	Zap	23	20	24	24	31	20	27	22	17	21	25
	008a	008M1	Tlaq	24	20	23	25	25	14	27	23	17	21	23
	21a	021M2	Tlaq	21	19	23	23	29	19	25	21	15	21	24
	20a	020M2	zap	21	0	22	18	34	19	25	20	16	20	22
	24a	024M2	GDL	0	0	24	22	29	0	22	21	0	9	0
	009irv	009M1	Tlaq	20	18	22	19	34	16	21	18	14	17	20
	25a	025M3	GDL	21	19	23	22	33	20	23	19	16	19	23
	3	087M8	Zap	24	23	24	24	32	20	26	22	16	20	23
	159vt	015M2	Zap	0	0	15	13	27	18	22	17	0	20	15
	17b	017M2	Zap	22	0	22	23	31	19	23	22	12	20	22
	22	047M5	Zap	0	0	10	7	24	18	27	20	0	20	20
	23	053M5	GDL	19	0	16	0	25	15	25	19	10	20	0
	24	057M5	Tlaq	0	0	13	7	27	18	27	19	0	20	15
	28	039M4	Zap	23	0	22	22	34	19	29	21	10	21	26
	30	040M4	Zap	19	18	19	20	25	18	23	19	16	18	21
	31	031M3	Zap	21	18	22	22	26	19	24	19	12	20	22
	35	032M3	Zap	21	16	18	20	28	18	25	21	12	20	20
	36	045M4	Zap	20	17	20	22	30	19	23	20	15	18	20
	37	049M5	Zap	22	19	22	24	32	18	25	19	18	20	22
	38	037M4	GDL	21	18	22	20	30	19	23	20	15	18	20
	39	043M4	Zap	22	18	0	23	16	19	20	21	0	21	18
	40	046M4	Zap	24	19	0	24	25	17	17	17	15	0	20
	41	035M3	Tlaq	19	17	19	21	22	17	21	15	18	16	19
	42	052M5	GDL	23	0	17	0	29	18	26	23	11	20	0
	43	051M5	Zap	23	20	21	23	28	21	25	22	16	19	21
	44	050M5	Zap	23	18	22	25	29	18	23	21	16	20	21
	45	056M5	Zap	0	0	14	9	27	18	26	21	0	21	14
	46	069M6	GDL	22	20	23	25	15	18	24	21	16	19	23
	48	048M5	Zap	0	0	12	0	27	13	24	16	9	17	19
	51	058M5	Tlaq	22	8	0	25	21	17	24	19	0	20	9
	1-m3	082M8	Zap	0	0	10	0	26	20	29	24	0	25	24
	8-m3	090M8	Tlaq	21	18	21	25	31	21	35	21	15	23	24
	10-m3	091M8	GDL	21	18	20	25	36	25	26	25	18	22	24
	14-m3	093M8	Tlaq	20	16	22	26	30	19	23	15	16	19	19
	16-m3	112M10	Zap	23	0	0	0	21	22	27	24	0	24	0
	19-m3	159M14	Tlaq	21	0	17	16	27	14	27	23	15	23	23
	20-m3	161M14	Tlaq	20	21	22	25	28	17	24	19	15	20	23
	21-m3	164M14	Zap	0	7	14	0	30	0	15	21	0	9	0
	23-m3	168M14	Zap	0	0	12	0	22	0	14	14	0	10	0
	24-m3	169M14	Zap	22	0	23	21	30	20	24	21	7	22	22
	28-m3	089M8	Tlaq	21	0	20	14	29	19	25	20	0	20	22
	31-m3	076M7	Zap	25	0	22	0	34	23	25	24	0	23	0
	32-m3	077M7	Zap	21	19	23	24	29	17	22	15	14	8	19
	34-m3	078M7	Zap	22	0	22	19	30	20	26	22	7	21	20
	36-m3	079M7	Zap	21	0	21	20	32	21	24	23	0	20	21
	38-m3	080M7	Zap	24	0	22	20	33	23	29	24	0	23	24
	40-m3	081M7	Zap	0	0	20	0	28	8	26	24	14	22	20
	42-m3	072M7	Tlaq	0	0	16	0	33	0	16	20	0	8	0
	43	170M15	Tlaq	25	29	0	27	30	24	29	27	23	24	10
	44	171M15	Tlaq	27	21	26	28	31	22	29	25	20	26	24
	45	172M15	Tlaq	27	25	26	27	33	25	28	24	22	14	25
	46	173M15	Zap	0	0	16	0	30	20	30	26	0	22	23
	48	178M15	Zap	0	16	27	22	33	24	33	24	17	24	27
	85	214M18	Zap	34	25	30	33	35	30	36	32	28	30	29
	87	216M19	Zap	23	17	14	24	26	21	29	24	23	26	24
	88	217M19	Zap	27	23	25	29	36	24	31	26	21	23	27
	90	219M19	Zap	26	23	26	28	35	24	31	27	19	26	27
	92	220M19	Zap	24	0	25	23	36	24	28	27	15	25	27
	93	221M19	Zap	27	22	23	25	34	27	29	26	17	24	25
	94	222M19	Zap	24	20	0	27	28	20	30	24	16	23	25
	95	223M19	Tlaq	26	21	21	26	39	25	31	24	16	24	25
	96	225M19	Tlaq	23	18	0	25	28	22	27	23	14	22	26
	49	180M15	Zap	24	20	25	27	32	20	27	23	17	22	26
	50	041M4	Zap	24	19	26	25	31	22	29	24	17	24	24
	51	182M16	Zap	25	20	0	28	35	23	27	24	18	22	24
	52	183M16	Zap	24	20	24	25	36	22	27	23	15	23	23
	54	185M16	Zap	21	18	21	22	29	21	27	22	16	21	15
	57	189M16	Tlaq	24	21	24	25	31	20	27	22	18	20	24
	58	190M16	Tlaq	22	17	20	21	29	18	27	22	18	21	21
	59	191M16	Tlaq	22	0	24	0	27	16	24	21	8	20	22
	60	192M17	GDL	19	15	20	17	29	21	25	21	14	19	10
	61	193M17	Tlaq	20	18	22	24	33	20	22	23	16	19	23
	62	194M17	Tlaq	22	18	21	22	28	20	26	21	17	20	23
	63	195M17	Tlaq	0	0	11	0	27	17	26	21	0	21	13
	76	206M18	Tlaq	24	9	27	29	37	24	27	26	17	25	24
	77	207M18	Tlaq	27	27	11	30	26	22	34	26	19	25	27
	78	208M18	Tlaq	22	20	21	24	34	21	30	24	20	21	27
	80	211M18	Zap	0	0	11	25	25	21	31	25	0	23	8
	8-m12	135M12	GDL	22	0	9	20	19	19	29	21	0	24	24
	11-m12	136M12	GDL	22	0	22	18	25	18	23	18	0	19	0
	54-M12	144M12	Zap	0	0	8	7	25	17	24	23	0	20	16
	1-m13	146M13	GDL	24	21	22	26	28	21	27	21	15	22	24
	38-m13	152M13	Zap	23	24	9	24	24	18	30	21	16	23	25
	1-m20	228M20	Tlaq	20	16	18	25	32	20	27	22	17	22	25
	22-m20	236M20	Tlaq	26	21	22	26	33	20	30	23	15	23	24
	10-m20	231M20	Tlaq	24	18	24	25	29	16	26	21	16	21	24
	36-m20	230M20	Tlaq	24	19	22	25	32	19	27	20	16	21	22
	43-m20	232M20	Tlaq	24	21	12	17	35	21	28	22	9	23	25
	57-m20	238M20	Zap	0	0	19	25	35	24	24	22	10	22	0
	64-m20	235M20	Tlaq	23	19	22	0	28	18	27	21	10	21	23
	65-m20	237M20	Zap	23	20	0	27	23	21	27	22	15	21	24
	5-m3	085M8	Zap	15	22	24	25	27	0	27	20	11	20	22
	12-m3	092M8	GDL	25	0	13	0	29	23	25	22	0	21	0
	17-m3	113M10	Zap	0	0	16	0	30	17	29	24	0	22	0
	20	013M2	Zap	0	0	18	10	30	17	28	22	0	20	15
	64	197M17	Zap	0	0	14	0	30	20	28	18	0	10	0
	65	200M17	Zap	0	0	14	0	25	16	24	21	0	22	0
	66	203M17	Zap	22	0	9	18	20	17	26	23	15	21	20
	82r	212M18	Zap	25	19	22	26	31	23	29	23	16	23	26
	100-m12	140M12	Zap	26	0	0	0	20	23	29	23	0	23	0
	84-m12	145M12	Zap	24	21	24	29	37	24	29	23	18	22	26
	35-m20	229M20	Tlaq	24	22	24	24	24	21	29	22	16	22	26
	73-m7	073M7	Tlaq	0	0	17	0	24	11	24	23	25	23	22
	61-m5	055M5	Zap	9	22	22	29	27	0	26	21	18	22	25
	054rbv	054M5	Zap	0	0	14	0	27	18	25	23	10	22	15
	17-m12	142M12	Zap	20	19	22	23	31	21	27	22	15	21	23
	45-m16	187M16	Zap	23	20	25	0	25	23	24	22	16	21	25
	63-m12	131M12	Tlaq	25	20	24	0	23	23	26	21	15	21	25
	90-m12	134M12	GDL	25	0	10	21	25	23	31	23	8	23	25
	34arx	034M3	Zap	22	19	22	23	30	18	24	22	18	20	25
	066-m6	066M6	Tlaq	24	20	24	25	34	23	29	22	26	23	24
	064-m6	064M6	Zap	24	26	24	26	33	23	29	24	17	23	26
	56-m14	162M14	Zap	25	20	27	27	33	23	29	23	18	28	26
	30-m3	030M3	Zap	23	20	23	26	28	21	25	21	17	20	25
	42tx-m4	042M4	Zap	22	0	22	20	30	19	24	24	13	22	24
	20-m12	143M12	Zap	0	0	16	8	30	20	29	22	0	21	17
	1-m12	130M12	Tlaq	23	20	25	25	32	22	28	22	22	21	25
	4-m13	151M13	Zap	22	21	24	25	28	19	25	20	18	22	25
	10-m13	153M13	Zap	25	19	26	25	34	22	27	23	16	23	25
	132-m12	132M12	Tlaq	24	21	25	27	36	22	27	21	17	23	26
	188-m16	188M16	Zap	26	0	12	24	29	25	28	24	0	24	24
	084-m8	084M8	Zap	24	18	0	25	36	21	26	22	16	22	24
	071-m7	071M7	Tlaq	25	0	0	0	20	25	28	24	0	21	0
	067-m6	067M6	Tlaq	24	0	0	24	28	24	29	23	0	23	25
	010-m1	010M1	GDL	0	0	14	13	27	19	25	24	0	22	17
	83r	213M18	Zap	22	20	22	24	29	20	25	20	17	21	25
	50	181M16	GDL	23	19	23	26	37	21	28	22	16	22	25
	86	215M18	Zap	22	18	24	25	35	22	28	23	18	22	25
	53	184M16	Zap	22	20	23	25	37	23	27	23	16	23	26
	30-m11	129M11	Zap	23	19	24	25	32	22	26	23	16	22	27
	1-m11	119M11	Tlaq	24	0	22	25	34	21	27	22	16	22	24
	97r	226M19	Tlaq	22	19	21	24	28	19	25	21	17	20	25
	10	003M1	Zap	21	19	23	24	31	21	25	22	18	21	22
	25			0	0	10	0	24	18	27	20	7	22	23
	26			24	0	22	27	33	23	27	23	12	22	26
	27			20	19	23	28	27	20	21	21	13	19	21
	29			18	20	9	0	25	20	23	0	8	19	24
	33			20	0	16	0	27	17	25	19	13	19	0
	55			22	21	25	22	32	21	24	23	16	22	24
	82			22	18	22	25	32	22	27	23	17	22	24
	7-m13			27	26	13	27	26	23	30	24	18	24	28
	23-m12			23	20	22	26	35	22	29	23	17	22	26
	10-m13			25	19	25	25	32	23	23	24	17	22	24
	4-m13			22	19	22	24	30	17	23	20	16	20	21
	53			22	14	19	25	31	24	30	22	16	23	0
	86r			24	19	25	25	33	20	26	20	15	21	25
	20-m12			0	0	15	11	22	15	24	20	0	20	14
	23-m3			0	0	15	0	33	0	18	18	0	9	0

## Sheet: Perfiles
CEPA	MUNICIPIO	(AM)	(TE)	(NA)	(SXT)	(CIP)	(CF)	(CRO)	(K)	(S)	(GM)	(C)
011 M1	Tlaq	20	19	20	19	27	20	25	21	16	19	21
019M2	Zap	20	0	22	17	24	17	23	18	8	18	20
029M3	Zap	0	0	14	11	28	16	25	22	0	19	17
006M1	Zap	22	0	23	24	32	20	26	20	11	20	23
012M1	GDL	25	20	26	24	32	24	25	24	18	22	23
027M3	Zap	24	19	25	24	34	22	36	21	17	21	24
016M2	Zap	20	0	20	0	30	17	24	21	14	20	21
001M1	Zap	22	0	22	17	28	17	22	19	10	18	22
002M1	Zap	23	20	24	24	31	20	27	22	17	21	25
008M1	Tlaq	24	20	23	25	25	14	27	23	17	21	23
021M2	Tlaq	21	19	23	23	29	19	25	21	15	21	24
020M2	zap	21	0	22	18	34	19	25	20	16	20	22
024M2	GDL	0	0	24	22	29	0	22	21	0	9	0
009M1	Tlaq	20	18	22	19	34	16	21	18	14	17	20
025M3	GDL	21	19	23	22	33	20	23	19	16	19	23
087M8	Zap	24	23	24	24	32	20	26	22	16	20	23
015M2	Zap	0	0	15	13	27	18	22	17	0	20	15
017M2	Zap	22	0	22	23	31	19	23	22	12	20	22
047M5	Zap	0	0	10	7	24	18	27	20	0	20	20
053M5	GDL	19	0	16	0	25	15	25	19	10	20	0
057M5	Tlaq	0	0	13	7	27	18	27	19	0	20	15
039M4	Zap	23	0	22	22	34	19	29	21	10	21	26
040M4	Zap	19	18	19	20	25	18	23	19	16	18	21
031M3	Zap	21	18	22	22	26	19	24	19	12	20	22
032M3	Zap	21	16	18	20	28	18	25	21	12	20	20
045M4	Zap	20	17	20	22	30	19	23	20	15	18	20
049M5	Zap	22	19	22	24	32	18	25	19	18	20	22
037M4	GDL	21	18	22	20	30	19	23	20	15	18	20
043M4	Zap	22	18	0	29	33	19	30	24	0	21	18
046M4	Zap	24	19	0	24	25	17	17	17	15	0	20
035M3	Tlaq	19	17	19	29	32	17	27	22	18	16	19
052M5	GDL	23	0	17	0	29	18	26	23	11	20	0
051M5	Zap	23	20	21	23	28	21	25	22	16	19	21
050M5	Zap	23	18	22	25	29	18	23	21	16	20	21
056M5	Zap	0	0	14	9	27	18	26	21	0	21	14
069M6	GDL	22	20	23	25	15	18	24	21	16	19	23
048M5	Zap	0	0	12	0	27	13	24	16	9	17	19
058M5	Tlaq	22	8	0	25	21	17	24	19	0	20	9
082M8	Zap	0	0	10	0	26	20	29	24	0	25	24
090M8	Tlaq	21	18	21	25	31	21	35	21	15	23	24
091M8	GDL	21	18	20	25	36	25	26	25	18	22	24
093M8	Tlaq	20	16	22	26	30	19	23	15	16	19	19
112M10	Zap	23	0	0	0	21	22	27	24	0	24	0
159M14	Tlaq	21	0	17	16	27	14	27	23	15	23	23
161M14	Tlaq	20	21	22	25	28	17	24	19	15	20	23
164M14	Zap	0	7	14	0	30	0	15	21	0	9	0
168M14	Zap	0	0	17	0	22	0	14	17	0	10	0
169M14	Zap	22	0	23	21	30	20	24	21	7	22	22
089M8	Tlaq	21	0	20	14	29	19	25	20	0	20	22
076M7	Zap	25	0	22	0	34	23	25	24	0	23	0
077M7	Zap	21	19	23	24	29	17	22	15	14	8	19
078M7	Zap	22	0	22	19	30	20	26	22	7	21	20
079M7	Zap	21	0	21	20	32	21	24	23	0	20	21
080M7	Zap	24	0	22	20	33	23	29	24	0	23	24
081M7	Zap	0	0	20	0	28	8	26	24	14	22	20
072M7	Tlaq	0	0	16	0	33	0	16	20	0	8	0
170M15	Tlaq	25	29	0	27	30	24	29	27	23	24	10
171M15	Tlaq	27	21	26	28	31	22	29	25	20	26	24
172M15	Tlaq	27	25	26	27	33	25	28	24	22	14	25
173M15	Zap	0	0	16	0	30	20	30	26	0	22	23
178M15	Zap	0	16	27	22	33	24	33	24	17	24	27
214M18	Zap	34	25	30	33	35	30	36	32	28	30	29
216M19	Zap	23	17	14	24	26	21	29	24	23	26	24
217M19	Zap	27	23	25	29	36	24	31	26	21	23	27
219M19	Zap	26	23	26	28	35	24	31	27	19	26	27
220M19	Zap	24	0	25	23	36	24	28	27	15	25	27
221M19	Zap	27	22	23	25	34	27	29	26	17	24	25
222M19	Zap	24	20	0	27	28	20	30	24	16	23	25
223M19	Tlaq	26	21	21	26	39	25	31	24	16	24	25
225M19	Tlaq	23	18	0	25	28	22	27	23	14	22	26
180M15	Zap	24	20	25	27	32	20	27	23	17	22	26
041M4	Zap	24	19	26	25	31	22	29	24	17	24	24
182M16	Zap	25	20	0	28	35	23	27	24	18	22	24
183M16	Zap	24	20	24	25	36	22	27	23	15	23	23
185M16	Zap	21	18	21	22	29	21	27	22	16	21	15
189M16	Tlaq	24	21	24	25	31	20	27	22	18	20	24
190M16	Tlaq	22	17	20	21	29	18	27	22	18	21	21
191M16	Tlaq	22	0	24	0	27	16	24	21	8	20	22
192M17	GDL	19	15	20	17	29	21	25	21	14	19	10
193M17	Tlaq	20	18	22	24	33	20	22	23	16	19	23
194M17	Tlaq	22	18	21	22	28	20	26	21	17	20	23
195M17	Tlaq	0	0	11	0	27	17	26	21	0	21	13
206M18	Tlaq	24	9	27	29	37	24	27	26	17	25	24
207M18	Tlaq	27	27	11	30	26	22	34	26	19	25	27
208M18	Tlaq	22	20	21	24	34	21	30	24	20	21	27
211M18	Zap	0	0	11	25	25	21	31	25	0	23	8
135M12	GDL	22	0	9	20	19	19	29	21	0	24	24
136M12	GDL	22	0	22	18	25	18	23	18	0	19	0
144M12	Zap	0	7	15	0	25	19	24	23	0	20	17
146M13	GDL	24	21	22	26	28	21	27	21	15	22	24
152M13	Zap	23	24	9	24	24	18	30	21	16	23	25
228M20	Tlaq	20	16	18	25	32	20	27	22	17	22	25
236M20	Tlaq	26	21	22	26	33	20	30	23	15	23	24
231M20	Tlaq	24	18	24	25	29	16	26	21	16	21	24
230M20	Tlaq	24	19	22	25	32	19	27	20	16	21	22
232M20	Tlaq	24	21	12	17	35	21	28	22	9	23	25
238M20	Zap	0	0	19	25	35	24	24	22	10	22	0
235M20	Tlaq	23	19	22	0	28	18	27	21	10	21	23
237M20	Zap	23	20	0	27	23	21	27	22	15	21	24
085M8	Zap	15	22	24	25	27	0	27	20	11	20	22
092M8	GDL	25	0	13	0	29	23	25	22	0	21	0
113M10	Zap	0	0	16	0	30	17	29	24	0	22	0
013M2	Zap	0	0	18	10	30	17	28	22	0	20	15
197M17	Zap	0	0	14	0	30	20	28	18	0	10	0
200M17	Zap	0	0	14	0	25	16	24	21	0	22	0
203M17	Zap	22	0	9	18	20	17	26	23	15	21	20
212M18	Zap	25	19	22	26	31	23	29	23	16	23	26
140M12	Zap	26	0	0	0	20	23	29	23	0	23	0
145M12	Zap	24	21	24	29	37	24	29	23	18	22	26
229M20	Tlaq	24	22	24	24	24	21	29	22	16	22	26
073M7	Tlaq	0	0	17	0	24	11	24	23	25	23	22
055M5	Zap	9	22	22	29	27	0	26	21	18	22	25
054M5	Zap	0	0	14	0	27	18	25	23	10	22	15
142M12	Zap	20	19	22	23	31	21	27	22	15	21	23
187M16	Zap	23	20	25	27	25	23	24	22	16	21	25
131M12	Tlaq	25	20	24	0	23	23	26	21	15	21	25
134M12	GDL	25	0	10	21	25	23	31	23	8	23	25
034M3	Zap	22	16	22	23	30	18	24	22	18	20	25
066M6	Tlaq	24	20	24	25	34	23	29	22	26	23	24
064M6	Zap	24	19	23	18	33	23	29	24	17	23	26
162M14	Zap	25	20	27	27	33	23	29	23	18	28	26
030M3	Zap	23	20	23	26	28	21	25	21	17	20	25
042M4	Zap	22	0	22	20	30	19	24	24	13	22	24
143M12	Zap	0	0	16	0	30	17	29	22	0	21	17
130M12	Tlaq	23	20	25	25	32	22	28	22	22	21	25
151M13	Zap	22	21	24	25	28	16	25	20	18	22	25
153M13	Zap	25	19	26	25	34	22	27	23	16	23	25
132M12	Tlaq	24	21	25	27	36	22	27	21	17	23	26
188M16	Zap	26	0	12	24	29	25	28	24	0	24	24
084M8	Zap	24	18	0	25	36	21	26	22	16	22	24
071M7	Tlaq	25	0	0	0	20	25	28	24	0	21	0
067M6	Tlaq	24	0	0	24	28	24	29	23	0	23	25
010M1	GDL	0	0	14	13	27	19	25	24	0	22	17
213M18	Zap	22	20	22	24	29	20	25	20	17	21	25
181M16	GDL	23	19	23	26	37	21	28	22	16	22	25
215M18	Zap	22	18	24	25	35	22	28	23	18	22	25
184M16	Zap	22	18	23	25	37	23	27	23	16	23	24
129M11	Zap	23	19	24	25	32	22	26	23	16	22	27
119M11	Tlaq	24	0	22	25	34	21	27	22	16	22	24
226M19	Tlaq	22	19	21	24	28	19	25	21	17	20	25
003M1	Zap	21	19	23	24	31	21	25	22	18	21	22
		(AM)	(TE)	(NA)	(SXT)	(CIP)	(CF)	(CRO)	(K)	(S)	(GM)	(C)
25		0	0	10	0	24	18	27	20	7	22	23
26		24	0	22	27	33	23	27	23	12	22	26
27		20	19	23	28	27	20	21	21	13	19	21
29		18	20	9	0	25	20	23	0	8	19	24
33		20	0	16	0	27	17	25	19	13	19	0
55		22	21	25	22	32	21	24	23	16	22	24
82		22	18	22	25	32	22	27	23	17	22	24
7-m13		27	26	13	27	26	23	30	24	18	24	28
23-m12		23	20	22	26	35	22	29	23	17	22	26
10-m13		25	19	25	25	32	23	23	24	17	22	24
4-m13		22	19	22	24	30	17	23	20	16	20	21
53		22	14	19	25	31	24	30	22	16	23	0
86r		24	19	25	25	33	20	26	20	15	21	25
20-m12		0	0	15	11	22	15	24	20	0	20	14
23-m3		0	0	15	0	33	0	18	18	0	9	0

## Sheet: Interpretación con repeticiones
CEPA	MUNICIPIO	(AM)	AM-INT	(TE)	TE- INT	(NA)	NA-INT	(SXT)	SXT-INT	(CIP)	CIP-INT	(CF)	CF- INT	(CRO)	CRO-INT	(K)	K- INT	(S)	S- INT	(GM)	GM-INT	(C)	C- INT	NOTAS
011 M1	Tlaq	20	S	19	S	20	S	19	S	27	S	20	S	25	S	21	S	16	S	19	S	21	S
019M2	Zap	20	S	0	R	22	S	17	S	24	S	17	I	23	S	18	S	8	R	18	S	20	S
029M3	Zap	0	R	0	R	14	I	11	I	28	S	16	I	25	S	22	S	0	R	19	S	17	I
006M1	Zap	22	S	0	R	23	S	24	S	32	S	20	S	26	S	20	S	11	R	20	S	23	S
012M1	GDL	25	S	20	S	26	S	24	S	32	S	24	S	25	S	24	S	18	S	22	S	23	S
027M3	Zap	24	S	19	S	25	S	24	S	34	S	22	S	36	S	21	S	17	S	21	S	24	S
016M2	Zap	20	S	0	R	20	S	0	R	30	S	17	I	24	S	21	S	14	I	20	S	21	S
001M1	Zap	22	S	0	R	22	S	17	S	28	S	17	I	22	S	19	S	10	R	18	S	22	S
002M1	Zap	23	S	20	S	24	S	24	S	31	S	20	S	27	S	22	S	17	S	21	S	25	S
008M1	Tlaq	24	S	20	S	23	S	25	S	25	S	14	R	27	S	23	S	17	S	21	S	23	S
021M2	Tlaq	21	S	19	S	23	S	23	S	29	S	19	S	25	S	21	S	15	S	21	S	24	S
020M2	zap	21	S	0	R	22	S	18	S	34	S	19	S	25	S	20	S	16	S	20	S	22	S
024M2	GDL	0	R	0	R	24	S	22	S	29	S	0	R	22	S	21	S	0	R	9	R	0	R
009M1	Tlaq	20	S	18	S	22	S	19	S	34	S	16	I	21	S	18	S	14	I	17	S	20	S
025M3	GDL	21	S	19	S	23	S	22	S	33	S	20	S	23	S	19	S	16	S	19	S	23	S
087M8	Zap	24	S	23	S	24	S	24	S	32	S	20	S	26	S	22	S	16	S	20	S	23	S
015M2	Zap	0	R	0	R	15	I	13	I	27	S	18	S	22	S	17	I	0	R	20	S	15	I
017M2	Zap	22	S	0	R	22	S	23	S	31	S	19	S	23	S	22	S	12	I	20	S	22	S
047M5	Zap	0	R	0	R	10	R	7	R	24	S	18	S	27	S	20	S	0	R	20	S	20	S
053M5	GDL	19	S	0	R	16	I	0	R	25	S	15	I	25	S	19	S	10	R	20	S	0	R
057M5	Tlaq	0	R	0	R	13	R	7	R	27	S	18	S	27	S	19	S	0	R	20	S	15	I
039M4	Zap	23	S	0	R	22	S	22	S	34	S	19	S	29	S	21	S	10	R	21	S	26	S
040M4	Zap	19	S	18	S	19	S	20	S	25	S	18	S	23	S	19	S	16	S	18	S	21	S
031M3	Zap	21	S	18	S	22	S	22	S	26	S	19	S	24	S	19	S	12	I	20	S	22	S
032M3	Zap	21	S	16	S	18	I	20	S	28	S	18	S	25	S	21	S	12	I	20	S	20	S
045M4	Zap	20	S	17	S	20	S	22	S	30	S	19	S	23	S	20	S	15	S	18	S	20	S
049M5	Zap	22	S	19	S	22	S	24	S	32	S	18	S	25	S	19	S	18	S	20	S	22	S
037M4	GDL	21	S	18	S	22	S	20	S	30	S	19	S	23	S	20	S	15	S	18	S	20	S
043M4	Zap	22	S	18	S	0	R	23	S	16	I	19	S	20	I	21	S	0	R	21	S	18	S
046M4	Zap	24	S	19	S	0	R	24	S	25	S	17	I	17	I	17	I	15	S	0	R	20	S
035M3	Tlaq	19	S	17	S	19	S	21	S	22	S	17	I	21	S	15	I	18	S	16	S	19	S
052M5	GDL	23	S	0	R	17	I	0	R	29	S	18	S	26	S	23	S	11	R	20	S	0	R
051M5	Zap	23	S	20	S	21	S	23	S	28	S	21	S	25	S	22	S	16	S	19	S	21	S
050M5	Zap	23	S	18	S	22	S	25	S	29	S	18	S	23	S	21	S	16	S	20	S	21	S
056M5	Zap	0	R	0	R	14	I	9	R	27	S	18	S	26	S	21	S	0	R	21	S	14	I
069M6	GDL	22	S	20	S	23	S	25	S	15	R	18	S	24	S	21	S	16	S	19	S	23	S
048M5	Zap	0	R	0	R	12	R	0	R	27	S	13	R	24	S	16	I	9	R	17	S	19	S
058M5	Tlaq	22	S	8	R	0	R	25	S	21	S	17	I	24	S	19	S	0	R	20	S	9	R
082M8	Zap	0	R	0	R	10	R	0	R	26	S	20	S	29	S	24	S	0	R	25	S	24	S
090M8	Tlaq	21	S	18	S	21	S	25	S	31	S	21	S	35	S	21	S	15	S	23	S	24	S
091M8	GDL	21	S	18	S	20	S	25	S	36	S	25	S	26	S	25	S	18	S	22	S	24	S
093M8	Tlaq	20	S	16	S	22	S	26	S	30	S	19	S	23	S	15	I	16	S	19	S	19	S
112M10	Zap	23	S	0	R	0	R	0	R	21	S	22	S	27	S	24	S	0	R	24	S	0	R
159M14	Tlaq	21	S	0	R	17	I	16	S	27	S	14	R	27	S	23	S	15	S	23	S	23	S
161M14	Tlaq	20	S	21	S	22	S	25	S	28	S	17	I	24	S	19	S	15	S	20	S	23	S
164M14	Zap	0	R	7	R	14	I	0	R	30	S	0	R	15	I	21	S	0	R	9	R	0	R
168M14	Zap	0	R	0	R	17	I	0	R	22	S	0	R	14	I	17	I	0	R	10	R	0	R
169M14	Zap	22	S	0	R	23	S	21	S	30	S	20	S	14	I	21	S	7	R	22	S	22	S
089M8	Tlaq	21	S	0	R	20	S	14	I	29	S	19	S	25	S	20	S	0	R	20	S	22	S
076M7	Zap	25	S	0	R	22	S	0	R	34	S	23	S	25	S	24	S	0	R	23	S	0	R
077M7	Zap	21	S	19	S	23	S	24	S	29	S	17	I	22	S	15	I	14	I	8	R	19	S
078M7	Zap	22	S	0	R	22	S	19	S	30	S	20	S	26	S	22	S	7	R	21	S	20	S
079M7	Zap	21	S	0	R	21	S	20	S	32	S	21	S	24	S	23	S	0	R	20	S	21	S
080M7	Zap	24	S	0	R	22	S	20	S	33	S	23	S	29	S	24	S	0	R	23	S	24	S
081M7	Zap	0	R	0	R	20	S	0	R	28	S	8	R	26	S	24	S	14	I	22	S	20	S
072M7	Tlaq	0	R	0	R	16	I	0	R	33	S	0	R	16	I	20	S	0	R	8	R	0	R
170M15	Tlaq	25	S	29	S	0	R	27	S	30	S	24	S	29	S	27	S	23	S	24	S	10	R
171M15	Tlaq	27	S	21	S	26	S	28	S	31	S	22	S	29	S	25	S	20	S	26	S	24	S
172M15	Tlaq	27	S	25	S	26	S	27	S	33	S	25	S	28	S	24	S	22	S	14	I	25	S
173M15	Zap	0	R	0	R	16	I	0	R	30	S	20	S	30	S	26	S	0	R	22	S	23	S
178M15	Zap	0	R	16	S	27	S	22	S	33	S	24	S	33	S	24	S	17	S	24	S	27	S
214M18	Zap	34	S	25	S	30	S	33	S	35	S	30	S	36	S	32	S	28	S	30	S	29	S
216M19	Zap	23	S	17	S	14	I	24	S	26	S	21	S	29	S	24	S	23	S	26	S	24	S
217M19	Zap	27	S	23	S	25	S	29	S	36	S	24	S	31	S	26	S	21	S	23	S	27	S
219M19	Zap	26	S	23	S	26	S	28	S	35	S	24	S	31	S	27	S	19	S	26	S	27	S
220M19	Zap	24	S	0	R	25	S	23	S	36	S	24	S	28	S	27	S	15	S	25	S	27	S
221M19	Zap	27	S	22	S	23	S	25	S	34	S	27	S	29	S	26	S	17	S	24	S	25	S
222M19	Zap	24	S	20	S	0	R	27	S	28	S	20	S	30	S	24	S	16	S	23	S	25	S
223M19	Tlaq	26	S	21	S	21	S	26	S	39	S	25	S	31	S	24	S	16	S	24	S	25	S
225M19	Tlaq	23	S	18	S	0	R	25	S	28	S	22	S	27	S	23	S	14	I	22	S	26	S
180M15	Zap	24	S	20	S	25	S	27	S	32	S	20	S	27	S	23	S	17	S	22	S	26	S
041M4	Zap	24	S	19	S	26	S	25	S	31	S	22	S	29	S	24	S	17	S	24	S	24	S
182M16	Zap	25	S	20	S	0	R	28	S	35	S	23	S	27	S	24	S	18	S	22	S	24	S
183M16	Zap	24	S	20	S	24	S	25	S	36	S	22	S	27	S	23	S	15	S	23	S	23	S
185M16	Zap	21	S	18	S	21	S	22	S	29	S	21	S	27	S	22	S	16	S	21	S	15	I
189M16	Tlaq	24	S	21	S	24	S	25	S	31	S	20	S	27	S	22	S	18	S	20	S	24	S
190M16	Tlaq	22	S	17	S	20	S	21	S	29	S	18	S	27	S	22	S	18	S	21	S	21	S
191M16	Tlaq	22	S	0	R	24	S	0	R	27	S	16	I	24	S	21	S	8	R	20	S	22	S
192M17	GDL	19	S	15	S	20	S	17	S	29	S	21	S	25	S	21	S	14	I	19	S	10	R
193M17	Tlaq	20	S	18	S	22	S	24	S	33	S	20	S	22	S	23	S	16	S	19	S	23	S
194M17	Tlaq	22	S	18	S	21	S	22	S	28	S	20	S	26	S	21	S	17	S	20	S	23	S
195M17	Tlaq	0	R	0	R	11	R	0	R	27	S	17	I	26	S	21	S	0	R	21	S	13	I
206M18	Tlaq	24	S	9	R	27	S	29	S	37	S	24	S	27	S	26	S	17	S	25	S	24	S
207M18	Tlaq	27	S	27	S	11	R	30	S	26	S	22	S	34	S	26	S	19	S	25	S	27	S
208M18	Tlaq	22	S	20	S	21	S	24	S	34	S	21	S	30	S	24	S	20	S	21	S	27	S
211M18	Zap	0	R	0	R	11	R	25	S	25	S	21	S	31	S	25	S	0	R	23	S	8	R
135M12	GDL	22	S	0	R	9	R	20	S	19	I	19	S	29	S	21	S	0	R	24	S	24	S
136M12	GDL	22	S	0	R	22	S	18	S	25	S	18	S	23	S	18	S	0	R	19	S	0	R
144M12	Zap	0	R	0	R	8	R	7	R	25	S	17	I	24	S	23	S	0	R	20	S	16	I
146M13	GDL	24	S	21	S	22	S	26	S	28	S	21	S	27	S	21	S	15	S	22	S	24	S
152M13	Zap	23	S	24	S	9	R	24	S	24	S	18	S	30	S	21	S	16	S	23	S	25	S
228M20	Tlaq	20	S	16	S	18	I	25	S	32	S	20	S	27	S	22	S	17	S	22	S	25	S
236M20	Tlaq	26	S	21	S	22	S	26	S	33	S	20	S	30	S	23	S	15	S	23	S	24	S
231M20	Tlaq	24	S	18	S	24	S	25	S	29	S	16	I	26	S	21	S	16	S	21	S	24	S
230M20	Tlaq	24	S	19	S	22	S	25	S	32	S	19	S	27	S	20	S	16	S	21	S	22	S
232M20	Tlaq	24	S	21	S	12	R	17	S	35	S	21	S	28	S	22	S	9	R	23	S	25	S
238M20	Zap	0	R	0	R	19	S	25	S	35	S	24	S	24	S	22	S	10	R	22	S	0	R
235M20	Tlaq	23	S	19	S	22	S	0	R	28	S	18	S	27	S	21	S	10	R	21	S	23	S
237M20	Zap	23	S	20	S	0	R	27	S	23	S	21	S	27	S	22	S	15	S	21	S	24	S
085M8	Zap	15	I	22	S	24	S	25	S	27	S	0	R	27	S	20	S	11	R	20	S	22	S
092M8	GDL	25	S	0	R	13	R	0	R	29	S	23	S	25	S	22	S	0	R	21	S	0	R
113M10	Zap	0	R	0	R	16	I	0	R	30	S	17	I	29	S	24	S	0	R	22	S	0	R
013M2	Zap	0	R	0	R	18	I	10	R	30	S	17	I	28	S	22	S	0	R	20	S	15	I
197M17	Zap	0	R	0	R	14	I	0	R	30	S	20	S	28	S	18	S	0	R	10	R	0	R
200M17	Zap	0	R	0	R	14	I	0	R	25	S	16	I	24	S	21	S	0	R	22	S	0	R
203M17	Zap	22	S	0	R	9	R	18	S	20	I	17	I	26	S	23	S	15	S	21	S	20	S
212M18	Zap	25	S	19	S	22	S	26	S	31	S	23	S	29	S	23	S	16	S	23	S	26	S
140M12	Zap	26	S	0	R	0	R	0	R	20	I	23	S	29	S	23	S	0	R	23	S	0	R
145M12	Zap	24	S	21	S	24	S	29	S	37	S	24	S	29	S	23	S	18	S	22	S	26	S
229M20	Tlaq	24	S	22	S	24	S	24	S	24	S	21	S	29	S	22	S	16	S	22	S	26	S
073M7	Tlaq	0	R	0	R	17	I	0	R	24	S	11	R	24	S	23	S	25	S	23	S	22	S
055M5	Zap	9	R	22	S	22	S	29	S	27	S	0	R	26	S	21	S	18	S	22	S	25	S
054M5	Zap	0	R	0	R	14	I	0	R	27	S	18	S	25	S	23	S	10	R	22	S	15	I
142M12	Zap	20	S	19	S	22	S	23	S	31	S	21	S	27	S	22	S	15	S	21	S	23	S
187M16	Zap	23	S	20	S	25	S	0	R	25	S	23	S	24	S	22	S	16	S	21	S	25	S
131M12	Tlaq	25	S	20	S	24	S	0	R	23	S	23	S	26	S	21	S	15	S	21	S	25	S
134M12	GDL	25	S	0	R	10	R	21	S	25	S	23	S	31	S	23	S	8	R	23	S	25	S
034M3	Zap	22	S	19	S	22	S	23	S	30	S	18	S	24	S	22	S	18	S	20	S	25	S
066M6	Tlaq	24	S	20	S	24	S	25	S	34	S	23	S	29	S	22	S	26	S	23	S	24	S
064M6	Zap	24	S	26	S	24	S	26	S	33	S	23	S	29	S	24	S	17	S	23	S	26	S
162M14	Zap	24	S	20	S	27	S	27	S	33	S	23	S	29	S	23	S	18	S	28	S	26	S
030M3	Zap	24	S	20	S	23	S	26	S	28	S	21	S	25	S	21	S	17	S	20	S	25	S
042M4	Zap	24	S	0	R	22	S	20	S	30	S	19	S	24	S	24	S	13	I	22	S	24	S
143M12	Zap	24	S	0	R	16	I	0	R	30	S	17	I	29	S	22	S	0	R	21	S	17	I
130M12	Tlaq	24	S	20	S	25	S	25	S	32	S	22	S	28	S	22	S	22	S	21	S	25	S
151M13	Zap	24	S	21	S	24	S	25	S	28	S	16	I	25	S	20	S	18	S	22	S	25	S
153M13	Zap	24	S	19	S	26	S	25	S	34	S	22	S	27	S	23	S	16	S	23	S	25	S
132M12	Tlaq	24	S	21	S	25	S	27	S	36	S	22	S	27	S	21	S	17	S	23	S	26	S
188M16	Zap	24	S	0	R	12	R	24	S	29	S	25	S	28	S	24	S	0	R	24	S	24	S
084M8	Zap	24	S	18	S	0	R	25	S	36	S	21	S	26	S	22	S	16	S	22	S	24	S
071M7	Tlaq	24	S	0	R	0	R	0	R	20	I	25	S	28	S	24	S	0	R	21	S	0	R
067M6	Tlaq	24	S	0	R	0	R	24	S	28	S	24	S	29	S	23	S	0	R	23	S	25	S
010M1	GDL	24	S	0	R	14	I	13	I	27	S	19	S	25	S	24	S	0	R	22	S	17	I
213M18	Zap	24	S	20	S	22	S	24	S	29	S	20	S	25	S	20	S	17	S	21	S	25	S
181M16	GDL	24	S	19	S	23	S	26	S	37	S	21	S	28	S	22	S	16	S	22	S	25	S
215M18	Zap	24	S	18	S	24	S	25	S	35	S	22	S	28	S	23	S	18	S	22	S	25	S
184M16	Zap	24	S	18	S	23	S	25	S	37	S	23	S	27	S	23	S	16	S	23	S	24	S
129M11	Zap	24	S	19	S	24	S	25	S	32	S	22	S	26	S	23	S	16	S	22	S	27	S
119M11	Tlaq	24	S	0	R	22	S	25	S	34	S	21	S	27	S	22	S	16	S	22	S	24	S
226M19	Tlaq	24	S	19	S	21	S	24	S	28	S	19	S	25	S	21	S	17	S	20	S	25	S
003M1	Zap	24	S	19	S	23	S	24	S	31	S	21	S	25	S	22	S	18	S	21	S	22	S
CEPAS CUYOS PERFILES HAY QUE CONFIRMAR						PERFIL A REPETIR				PERFIL REPETIDO Y ANOTADO
		(AM)	AM-INT	(TE)	TE- INT	(NA)	NA-INT	(SXT)	SXT-INT	(CIP)	CIP-INT	(CF)	CF- INT	(CRO)	CRO-INT	(K)	K- INT	(S)	S- INT	(GM)	GM-INT	(C)	C- INT
151M13	Zap	22	S	21	S	24	S	25	S	28	S	16	I	25	S	20	S	18	S	22	S	25	S
4-m13		22	S	19	S	22	S	24	S	30	S	17	I	23	S	20	S	16	S	20	S	21	S
151M13	Zap	24	S	21	S	24	S	25	S	28	S	16	I	25	S	20	S	18	S	22	S	25	S
184M16	Zap	22	S	18	S	23	S	25	S	37	S	23	S	27	S	23	S	16	S	23	S	26	S
53		22	S	14	I	19	S	25	S	31	S	24	S	30	S	22	S	16	S	23	S	24	S
184M16	Zap	24	S	18	S	23	S	25	S	37	S	23	S	27	S	23	S	16	S	23	S	24	S
143M12	Zap	0	R	0	R	16	I	8	R	30	S	17	I	29	S	22	S	0	R	21	S	17	I
20-m12		0	R	0	R	15	I	0	R	22	S	15	I	24	S	20	S	0	R	20	S	14	I
143M12	Zap	24	S	0	R	16	I	0	R	30	S	17	I	29	S	22	S	0	R	21	S	17	I
168M14	Zap	0	R	0	R	17	I	0	R	22	S	0	R	14	I	14	I	0	R	10	R	0	R
23-m3		0	R	0	R	15	I	0	R	33	S	0	R	18	I	18	S	0	R	9	R	0	R
168M14	Zap	0	R	0	R	17	I	0	R	22	S	0	R	14	I	17	I	0	R	10	R	0	R
064M6	Zap	24	S	26	S	24	S	26	S	33	S	23	S	29	S	24	S	17	S	23	S	26	S
25		24	S	0	R	10	R	0	R	24	S	18	S	27	S	20	S	7	R	22	S	23	S
064M6	Zap	24	S	19	S	23	S	18	S	33	S	23	S	29	S	24	S	17	S	23	S	26	S
034M3	Zap	22	S	19	S	22	S	23	S	30	S	18	S	24	S	22	S	18	S	20	S	25	S
26		24	S	0	R	22	S	27	S	33	S	23	S	27	S	23	S	12	R	22	S	26	S
034M3	Zap	22	S	16	S	22	S	23	S	30	S	18	S	24	S	22	S	18	S	20	S	25	S
042M4	Zap	24	S	0	R	22	S	20	S	30	S	19	S	24	S	24	S	13	I	22	S	24	S
27		24	S	19	S	23	S	28	S	27	S	20	S	21	S	21	S	13	I	19	S	21	S
042M4	Zap	24	S	0	R	22	S	20	S	30	S	19	S	24	S	24	S	13	I	22	S	24	S
043M4	Zap	22	S	18	S	0	R	23	S	16	I	19	S	20	I	21	S	0	R	21	S	18	S
29		24	S	20	S	9	R	0	R	25	S	20	S	23	S	0	R	8	R	19	S	24	S
043M4	Zap	22	S	18	S	0	R	29	S	33	S	19	S	30	S	24	S	0	R	21	S	18	S
035M3	Tlaq	19	S	17	S	19	R	21	S	22	S	17	S	21	S	15	I	18	R	16	S	19	S
33		24	S	20	S	9	R	0	R	25	S	20	S	23	S	0	R	8	R	19	S	24	S
035M3	Tlaq	19	S	17	S	19	S	29	S	32	S	17	I	27	S	22	S	18	S	16	S	19	S
187M16	Zap	23	S	20	S	25	S	0	R	25	S	23	S	24	S	22	S	16	S	21	S	25	S
55		24	S	21	S	25	S	22	S	32	S	21	S	24	S	23	S	16	S	22	S	24	S
187M16	Zap	23	S	20	S	25	S	27	S	25	S	23	S	24	S	22	S	16	S	21	S	25	S
144M12	Zap	0	R	0	R	8	R	7	R	25	S	17	I	24	S	23	S	0	R	20	S	16	I
23M12		24	S	20	S	22	S	26	S	35	S	22	S	29	S	23	S	17	S	22	S	26	S
144M12	Zap	0	R	7	R	15	I	0	R	25	S	19	S	24	S	23	S	0	R	20	S	17	I
CEPAS REPETIDAS CON PERFILES IGUALES
153M13	Zap	24	S	19	S	26	S	25	S	34	S	22	S	27	S	23	S	16	S	23	S	25	S
10-m13		25	S	19	S	25	S	25	S	32	S	23	S	23	S	24	S	17	S	22	S	24	S
212M18	Zap	25	S	19	S	22	S	26	S	31	S	23	S	29	S	23	S	16	S	23	S	26	S
82		24	S	18	S	22	S	25	S	32	S	22	S	27	S	23	S	17	S	22	S	24	S
152M13	Zap	23	S	24	S	9	R	24	S	24	S	18	S	30	S	21	S	16	S	23	S	25	S
7M13		24	S	26	S	13	R	27	S	26	S	23	S	30	S	24	S	18	S	24	S	28	S
215M18	Zap	24	S	18	S	24	S	25	S	35	S	22	S	28	S	23	S	18	S	22	S	25	S
86r		24	S	19	S	25	S	25	S	33	S	20	S	26	S	20	S	15	S	21	S	25	S

## Sheet: Interpretación (bueno)
CEPA	MUNICIPIO	(AM)	AM-INT	(TE)	TE- INT	(NA)	NA-INT	(SXT)	SXT-INT	(CIP)	CIP-INT	(CF)	CF- INT	(CRO)	CRO-INT	(K)	K- INT	(S)	S- INT	(GM)	GM-INT	(C)	C- INT	NOTAS
011 M1	Tlaq	20	S	19	S	20	S	19	S	27	S	20	S	25	S	21	S	16	S	19	S	21	S
019M2	Zap	20	S	0	R	22	S	17	S	24	S	17	I	23	S	18	S	8	R	18	S	20	S
029M3	Zap	0	R	0	R	14	I	11	I	28	S	16	I	25	S	22	S	0	R	19	S	17	I
006M1	Zap	22	S	0	R	23	S	24	S	32	S	20	S	26	S	20	S	11	R	20	S	23	S
012M1	GDL	25	S	20	S	26	S	24	S	32	S	24	S	25	S	24	S	18	S	22	S	23	S
027M3	Zap	24	S	19	S	25	S	24	S	34	S	22	S	36	S	21	S	17	S	21	S	24	S
016M2	Zap	20	S	0	R	20	S	0	R	30	S	17	I	24	S	21	S	14	I	20	S	21	S
001M1	Zap	22	S	0	R	22	S	17	S	28	S	17	I	22	S	19	S	10	R	18	S	22	S
002M1	Zap	23	S	20	S	24	S	24	S	31	S	20	S	27	S	22	S	17	S	21	S	25	S
008M1	Tlaq	24	S	20	S	23	S	25	S	25	S	14	R	27	S	23	S	17	S	21	S	23	S
021M2	Tlaq	21	S	19	S	23	S	23	S	29	S	19	S	25	S	21	S	15	S	21	S	24	S
020M2	zap	21	S	0	R	22	S	18	S	34	S	19	S	25	S	20	S	16	S	20	S	22	S
024M2	GDL	0	R	0	R	24	S	22	S	29	S	0	R	22	S	21	S	0	R	9	R	0	R
009M1	Tlaq	20	S	18	S	22	S	19	S	34	S	16	I	21	S	18	S	14	I	17	S	20	S
025M3	GDL	21	S	19	S	23	S	22	S	33	S	20	S	23	S	19	S	16	S	19	S	23	S
087M8	Zap	24	S	23	S	24	S	24	S	32	S	20	S	26	S	22	S	16	S	20	S	23	S
015M2	Zap	0	R	0	R	15	I	13	I	27	S	18	S	22	S	17	I	0	R	20	S	15	I
017M2	Zap	22	S	0	R	22	S	23	S	31	S	19	S	23	S	22	S	12	I	20	S	22	S
047M5	Zap	0	R	0	R	10	R	7	R	24	S	18	S	27	S	20	S	0	R	20	S	20	S
053M5	GDL	19	S	0	R	16	I	0	R	25	S	15	I	25	S	19	S	10	R	20	S	0	R
057M5	Tlaq	0	R	0	R	13	R	7	R	27	S	18	S	27	S	19	S	0	R	20	S	15	I
039M4	Zap	23	S	0	R	22	S	22	S	34	S	19	S	29	S	21	S	10	R	21	S	26	S
040M4	Zap	19	S	18	S	19	S	20	S	25	S	18	S	23	S	19	S	16	S	18	S	21	S
031M3	Zap	21	S	18	S	22	S	22	S	26	S	19	S	24	S	19	S	12	I	20	S	22	S
032M3	Zap	21	S	16	S	18	I	20	S	28	S	18	S	25	S	21	S	12	I	20	S	20	S
045M4	Zap	20	S	17	S	20	S	22	S	30	S	19	S	23	S	20	S	15	S	18	S	20	S
049M5	Zap	22	S	19	S	22	S	24	S	32	S	18	S	25	S	19	S	18	S	20	S	22	S
037M4	GDL	21	S	18	S	22	S	20	S	30	S	19	S	23	S	20	S	15	S	18	S	20	S
043M4	Zap	22	S	18	S	0	R	29	S	33	S	19	S	30	S	24	S	0	R	21	S	18	S
046M4	Zap	24	S	19	S	0	R	24	S	25	S	17	I	17	I	17	I	15	S	0	R	20	S
035M3	Tlaq	19	S	17	S	19	S	29	S	32	S	17	I	27	S	22	S	18	S	16	S	19	S
052M5	GDL	23	S	0	R	17	I	0	R	29	S	18	S	26	S	23	S	11	R	20	S	0	R
051M5	Zap	23	S	20	S	21	S	23	S	28	S	21	S	25	S	22	S	16	S	19	S	21	S
050M5	Zap	23	S	18	S	22	S	25	S	29	S	18	S	23	S	21	S	16	S	20	S	21	S
056M5	Zap	0	R	0	R	14	I	9	R	27	S	18	S	26	S	21	S	0	R	21	S	14	I
069M6	GDL	22	S	20	S	23	S	25	S	15	R	18	S	24	S	21	S	16	S	19	S	23	S
048M5	Zap	0	R	0	R	12	R	0	R	27	S	13	R	24	S	16	I	9	R	17	S	19	S
058M5	Tlaq	22	S	8	R	0	R	25	S	21	S	17	I	24	S	19	S	0	R	20	S	9	R
082M8	Zap	0	R	0	R	10	R	0	R	26	S	20	S	29	S	24	S	0	R	25	S	24	S
090M8	Tlaq	21	S	18	S	21	S	25	S	31	S	21	S	35	S	21	S	15	S	23	S	24	S
091M8	GDL	21	S	18	S	20	S	25	S	36	S	25	S	26	S	25	S	18	S	22	S	24	S
093M8	Tlaq	20	S	16	S	22	S	26	S	30	S	19	S	23	S	15	I	16	S	19	S	19	S
112M10	Zap	23	S	0	R	0	R	0	R	21	S	22	S	27	S	24	S	0	R	24	S	0	R
159M14	Tlaq	21	S	0	R	17	I	16	S	27	S	14	R	27	S	23	S	15	S	23	S	23	S
161M14	Tlaq	20	S	21	S	22	S	25	S	28	S	17	I	24	S	19	S	15	S	20	S	23	S
164M14	Zap	0	R	7	R	14	I	0	R	30	S	0	R	15	I	21	S	0	R	9	R	0	R
168M14	Zap	0	R	0	R	17	I	0	R	22	S	0	R	14	I	17	I	0	R	10	R	0	R
169M14	Zap	22	S	0	R	23	S	21	S	30	S	20	S	24	S	21	S	7	R	22	S	22	S
089M8	Tlaq	21	S	0	R	20	S	14	I	29	S	19	S	25	S	20	S	0	R	20	S	22	S
076M7	Zap	25	S	0	R	22	S	0	R	34	S	23	S	25	S	24	S	0	R	23	S	0	R
077M7	Zap	21	S	19	S	23	S	24	S	29	S	17	I	22	S	15	I	14	I	8	R	19	S
078M7	Zap	22	S	0	R	22	S	19	S	30	S	20	S	26	S	22	S	7	R	21	S	20	S
079M7	Zap	21	S	0	R	21	S	20	S	32	S	21	S	24	S	23	S	0	R	20	S	21	S
080M7	Zap	24	S	0	R	22	S	20	S	33	S	23	S	29	S	24	S	0	R	23	S	24	S
081M7	Zap	0	R	0	R	20	S	0	R	28	S	8	R	26	S	24	S	14	I	22	S	20	S
072M7	Tlaq	0	R	0	R	16	I	0	R	33	S	0	R	16	I	20	S	0	R	8	R	0	R
170M15	Tlaq	25	S	29	S	0	R	27	S	30	S	24	S	29	S	27	S	23	S	24	S	10	R
171M15	Tlaq	27	S	21	S	26	S	28	S	31	S	22	S	29	S	25	S	20	S	26	S	24	S
172M15	Tlaq	27	S	25	S	26	S	27	S	33	S	25	S	28	S	24	S	22	S	14	I	25	S
173M15	Zap	0	R	0	R	16	I	0	R	30	S	20	S	30	S	26	S	0	R	22	S	23	S
178M15	Zap	0	R	16	S	27	S	22	S	33	S	24	S	33	S	24	S	17	S	24	S	27	S
214M18	Zap	34	S	25	S	30	S	33	S	35	S	30	S	36	S	32	S	28	S	30	S	29	S
216M19	Zap	23	S	17	S	14	I	24	S	26	S	21	S	29	S	24	S	23	S	26	S	24	S
217M19	Zap	27	S	23	S	25	S	29	S	36	S	24	S	31	S	26	S	21	S	23	S	27	S
219M19	Zap	26	S	23	S	26	S	28	S	35	S	24	S	31	S	27	S	19	S	26	S	27	S
220M19	Zap	24	S	0	R	25	S	23	S	36	S	24	S	28	S	27	S	15	S	25	S	27	S
221M19	Zap	27	S	22	S	23	S	25	S	34	S	27	S	29	S	26	S	17	S	24	S	25	S
222M19	Zap	24	S	20	S	0	R	27	S	28	S	20	S	30	S	24	S	16	S	23	S	25	S
223M19	Tlaq	26	S	21	S	21	S	26	S	39	S	25	S	31	S	24	S	16	S	24	S	25	S
225M19	Tlaq	23	S	18	S	0	R	25	S	28	S	22	S	27	S	23	S	14	I	22	S	26	S
180M15	Zap	24	S	20	S	25	S	27	S	32	S	20	S	27	S	23	S	17	S	22	S	26	S
041M4	Zap	24	S	19	S	26	S	25	S	31	S	22	S	29	S	24	S	17	S	24	S	24	S
182M16	Zap	25	S	20	S	0	R	28	S	35	S	23	S	27	S	24	S	18	S	22	S	24	S
183M16	Zap	24	S	20	S	24	S	25	S	36	S	22	S	27	S	23	S	15	S	23	S	23	S
185M16	Zap	21	S	18	S	21	S	22	S	29	S	21	S	27	S	22	S	16	S	21	S	15	I
189M16	Tlaq	24	S	21	S	24	S	25	S	31	S	20	S	27	S	22	S	18	S	20	S	24	S
190M16	Tlaq	22	S	17	S	20	S	21	S	29	S	18	S	27	S	22	S	18	S	21	S	21	S
191M16	Tlaq	22	S	0	R	24	S	0	R	27	S	16	I	24	S	21	S	8	R	20	S	22	S
192M17	GDL	19	S	15	S	20	S	17	S	29	S	21	S	25	S	21	S	14	I	19	S	10	R
193M17	Tlaq	20	S	18	S	22	S	24	S	33	S	20	S	22	S	23	S	16	S	19	S	23	S
194M17	Tlaq	22	S	18	S	21	S	22	S	28	S	20	S	26	S	21	S	17	S	20	S	23	S
195M17	Tlaq	0	R	0	R	11	R	0	R	27	S	17	I	26	S	21	S	0	R	21	S	13	I
206M18	Tlaq	24	S	9	R	27	S	29	S	37	S	24	S	27	S	26	S	17	S	25	S	24	S
207M18	Tlaq	27	S	27	S	11	R	30	S	26	S	22	S	34	S	26	S	19	S	25	S	27	S
208M18	Tlaq	22	S	20	S	21	S	24	S	34	S	21	S	30	S	24	S	20	S	21	S	27	S
211M18	Zap	0	R	0	R	11	R	25	S	25	S	21	S	31	S	25	S	0	R	23	S	8	R
135M12	GDL	22	S	0	R	9	R	20	S	19	I	19	S	29	S	21	S	0	R	24	S	24	S
136M12	GDL	22	S	0	R	22	S	18	S	25	S	18	S	23	S	18	S	0	R	19	S	0	R
144M12	Zap	0	R	7	R	15	I	0	R	25	S	19	S	24	S	23	S	0	R	20	S	17	I
146M13	GDL	24	S	21	S	22	S	26	S	28	S	21	S	27	S	21	S	15	S	22	S	24	S
152M13	Zap	23	S	24	S	9	R	24	S	24	S	18	S	30	S	21	S	16	S	23	S	25	S
228M20	Tlaq	20	S	16	S	18	I	25	S	32	S	20	S	27	S	22	S	17	S	22	S	25	S
236M20	Tlaq	26	S	21	S	22	S	26	S	33	S	20	S	30	S	23	S	15	S	23	S	24	S
231M20	Tlaq	24	S	18	S	24	S	25	S	29	S	16	I	26	S	21	S	16	S	21	S	24	S
230M20	Tlaq	24	S	19	S	22	S	25	S	32	S	19	S	27	S	20	S	16	S	21	S	22	S
232M20	Tlaq	24	S	21	S	12	R	17	S	35	S	21	S	28	S	22	S	9	R	23	S	25	S
238M20	Zap	0	R	0	R	19	S	25	S	35	S	24	S	24	S	22	S	10	R	22	S	0	R
235M20	Tlaq	23	S	19	S	22	S	0	R	28	S	18	S	27	S	21	S	10	R	21	S	23	S
237M20	Zap	23	S	20	S	0	R	27	S	23	S	21	S	27	S	22	S	15	S	21	S	24	S
085M8	Zap	15	I	22	S	24	S	25	S	27	S	0	R	27	S	20	S	11	R	20	S	22	S
092M8	GDL	25	S	0	R	13	R	0	R	29	S	23	S	25	S	22	S	0	R	21	S	0	R
113M10	Zap	0	R	0	R	16	I	0	R	30	S	17	I	29	S	24	S	0	R	22	S	0	R
013M2	Zap	0	R	0	R	18	I	10	R	30	S	17	I	28	S	22	S	0	R	20	S	15	I
197M17	Zap	0	R	0	R	14	I	0	R	30	S	20	S	28	S	18	S	0	R	10	R	0	R
200M17	Zap	0	R	0	R	14	I	0	R	25	S	16	I	24	S	21	S	0	R	22	S	0	R
203M17	Zap	22	S	0	R	9	R	18	S	20	I	17	I	26	S	23	S	15	S	21	S	20	S
212M18	Zap	25	S	19	S	22	S	26	S	31	S	23	S	29	S	23	S	16	S	23	S	26	S
140M12	Zap	26	S	0	R	0	R	0	R	20	I	23	S	29	S	23	S	0	R	23	S	0	R
145M12	Zap	24	S	21	S	24	S	29	S	37	S	24	S	29	S	23	S	18	S	22	S	26	S
229M20	Tlaq	24	S	22	S	24	S	24	S	24	S	21	S	29	S	22	S	16	S	22	S	26	S
073M7	Tlaq	0	R	0	R	17	I	0	R	24	S	11	R	24	S	23	S	25	S	23	S	22	S
055M5	Zap	9	R	22	S	22	S	29	S	27	S	0	R	26	S	21	S	18	S	22	S	25	S
054M5	Zap	0	R	0	R	14	I	0	R	27	S	18	S	25	S	23	S	10	R	22	S	15	I
142M12	Zap	20	S	19	S	22	S	23	S	31	S	21	S	27	S	22	S	15	S	21	S	23	S
187M16	Zap	23	S	20	S	25	S	27	S	25	S	23	S	24	S	22	S	16	S	21	S	25	S
131M12	Tlaq	25	S	20	S	24	S	0	R	23	S	23	S	26	S	21	S	15	S	21	S	25	S
134M12	GDL	25	S	0	R	10	R	21	S	25	S	23	S	31	S	23	S	8	R	23	S	25	S
034M3	Zap	22	S	16	S	22	S	23	S	30	S	18	S	24	S	22	S	18	S	20	S	25	S
066M6	Tlaq	24	S	20	S	24	S	25	S	34	S	23	S	29	S	22	S	26	S	23	S	24	S
064M6	Zap	24	S	19	S	23	S	18	S	33	S	23	S	29	S	24	S	17	S	23	S	26	S
162M14	Zap	25	S	20	S	27	S	27	S	33	S	23	S	29	S	23	S	18	S	28	S	26	S
030M3	Zap	23	S	20	S	23	S	26	S	28	S	21	S	25	S	21	S	17	S	20	S	25	S
042M4	Zap	22	S	0	R	22	S	20	S	30	S	19	S	24	S	24	S	13	I	22	S	24	S
143M12	Zap	0	R	0	R	16	I	0	R	30	S	17	I	29	S	22	S	0	R	21	S	17	I
130M12	Tlaq	23	S	20	S	25	S	25	S	32	S	22	S	28	S	22	S	22	S	21	S	25	S
151M13	Zap	22	S	21	S	24	S	25	S	28	S	16	I	25	S	20	S	18	S	22	S	25	S
153M13	Zap	25	S	19	S	26	S	25	S	34	S	22	S	27	S	23	S	16	S	23	S	25	S
132M12	Tlaq	24	S	21	S	25	S	27	S	36	S	22	S	27	S	21	S	17	S	23	S	26	S
188M16	Zap	26	S	0	R	12	R	24	S	29	S	25	S	28	S	24	S	0	R	24	S	24	S
084M8	Zap	24	S	18	S	0	R	25	S	36	S	21	S	26	S	22	S	16	S	22	S	24	S
071M7	Tlaq	25	S	0	R	0	R	0	R	20	I	25	S	28	S	24	S	0	R	21	S	0	R
067M6	Tlaq	24	S	0	R	0	R	24	S	28	S	24	S	29	S	23	S	0	R	23	S	25	S
010M1	GDL	0	R	0	R	14	I	13	I	27	S	19	S	25	S	24	S	0	R	22	S	17	I
213M18	Zap	22	S	20	S	22	S	24	S	29	S	20	S	25	S	20	S	17	S	21	S	25	S
181M16	GDL	23	S	19	S	23	S	26	S	37	S	21	S	28	S	22	S	16	S	22	S	25	S
215M18	Zap	22	S	18	S	24	S	25	S	35	S	22	S	28	S	23	S	18	S	22	S	25	S
184M16	Zap	22	S	18	S	23	S	25	S	37	S	23	S	27	S	23	S	16	S	23	S	24	S
129M11	Zap	23	S	19	S	24	S	25	S	32	S	22	S	26	S	23	S	16	S	22	S	27	S
119M11	Tlaq	24	S	0	R	22	S	25	S	34	S	21	S	27	S	22	S	16	S	22	S	24	S
226M19	Tlaq	22	S	19	S	21	S	24	S	28	S	19	S	25	S	21	S	17	S	20	S	25	S
003M1	Zap	21	S	19	S	23	S	24	S	31	S	21	S	25	S	22	S	18	S	21	S	22	S
CEPA	MUNICIPIO	(AM)	AM-INT	(TE)	TE- INT	(NA)	NA-INT	(SXT)	SXT-INT	(CIP)	CIP-INT	(CF)	CF- INT	(CRO)	CRO-INT	(K)	K- INT	(S)	S- INT	(GM)	GM-INT	(C)	C- INT	NOTAS

## Sheet: Resistencia (municipios)
MUNICIPIO	CEPA	AM-INT	TE- INT	NA-INT	SXT-INT	CIP-INT	CF- INT	CRO-INT	K- INT	S- INT	GM-INT	C- INT	NOTAS
GDL	012M1	S	S	S	S	S	S	S	S	S	S	S
GDL	024M2	R	R	S	S	S	R	S	S	R	R	R
GDL	025M3	S	S	S	S	S	S	S	S	S	S	S
GDL	053M5	S	R	I	R	S	I	S	S	R	S	R
GDL	037M4	S	S	S	S	S	S	S	S	S	S	S
GDL	052M5	S	R	I	R	S	S	S	S	R	S	R
GDL	069M6	S	S	S	S	R	S	S	S	S	S	S
GDL	091M8	S	S	S	S	S	S	S	S	S	S	S
GDL	192M17	S	S	S	S	S	S	S	S	I	S	R
GDL	135M12	S	R	R	S	I	S	S	S	R	S	S
GDL	136M12	S	R	S	S	S	S	S	S	R	S	R
GDL	146M13	S	S	S	S	S	S	S	S	S	S	S
GDL	092M8	S	R	R	R	S	S	S	S	R	S	R
GDL	134M12	S	R	R	S	S	S	S	S	R	S	S
GDL	010M1	R	R	I	I	S	S	S	S	R	S	I
GDL	181M16	S	S	S	S	S	S	S	S	S	S	S
Tlaq	011 M1	S	S	S	S	S	S	S	S	S	S	S
Tlaq	008M1	S	S	S	S	S	R	S	S	S	S	S
Tlaq	021M2	S	S	S	S	S	S	S	S	S	S	S
Tlaq	009M1	S	S	S	S	S	I	S	S	I	S	S
Tlaq	057M5	R	R	R	R	S	S	S	S	R	S	I
Tlaq	035M3	S	S	S	S	S	I	S	S	S	S	S
Tlaq	058M5	S	R	R	S	S	I	S	S	R	S	R
Tlaq	090M8	S	S	S	S	S	S	S	S	S	S	S
Tlaq	093M8	S	S	S	S	S	S	S	I	S	S	S
Tlaq	159M14	S	R	I	S	S	R	S	S	S	S	S
Tlaq	161M14	S	S	S	S	S	I	S	S	S	S	S
Tlaq	089M8	S	R	S	I	S	S	S	S	R	S	S
Tlaq	072M7	R	R	I	R	S	R	I	S	R	R	R
Tlaq	170M15	S	S	R	S	S	S	S	S	S	S	R
Tlaq	171M15	S	S	S	S	S	S	S	S	S	S	S
Tlaq	172M15	S	S	S	S	S	S	S	S	S	I	S
Tlaq	223M19	S	S	S	S	S	S	S	S	S	S	S
Tlaq	225M19	S	S	R	S	S	S	S	S	I	S	S
Tlaq	189M16	S	S	S	S	S	S	S	S	S	S	S
Tlaq	190M16	S	S	S	S	S	S	S	S	S	S	S
Tlaq	191M16	S	R	S	R	S	I	S	S	R	S	S
Tlaq	193M17	S	S	S	S	S	S	S	S	S	S	S
Tlaq	194M17	S	S	S	S	S	S	S	S	S	S	S
Tlaq	195M17	R	R	R	R	S	I	S	S	R	S	I
Tlaq	206M18	S	R	S	S	S	S	S	S	S	S	S
Tlaq	207M18	S	S	R	S	S	S	S	S	S	S	S
Tlaq	208M18	S	S	S	S	S	S	S	S	S	S	S
Tlaq	228M20	S	S	I	S	S	S	S	S	S	S	S
Tlaq	236M20	S	S	S	S	S	S	S	S	S	S	S
Tlaq	231M20	S	S	S	S	S	I	S	S	S	S	S
Tlaq	230M20	S	S	S	S	S	S	S	S	S	S	S
Tlaq	232M20	S	S	R	S	S	S	S	S	R	S	S
Tlaq	235M20	S	S	S	R	S	S	S	S	R	S	S
Tlaq	229M20	S	S	S	S	S	S	S	S	S	S	S
Tlaq	073M7	R	R	I	R	S	R	S	S	S	S	S
Tlaq	131M12	S	S	S	R	S	S	S	S	S	S	S
Tlaq	066M6	S	S	S	S	S	S	S	S	S	S	S
Tlaq	130M12	S	S	S	S	S	S	S	S	S	S	S
Tlaq	132M12	S	S	S	S	S	S	S	S	S	S	S
Tlaq	071M7	S	R	R	R	I	S	S	S	R	S	R
Tlaq	067M6	S	R	R	S	S	S	S	S	R	S	S
Tlaq	119M11	S	R	S	S	S	S	S	S	S	S	S
Tlaq	226M19	S	S	S	S	S	S	S	S	S	S	S
Zap	019M2	S	R	S	S	S	I	S	S	R	S	S
Zap	029M3	R	R	I	I	S	I	S	S	R	S	I
Zap	006M1	S	R	S	S	S	S	S	S	R	S	S
Zap	027M3	S	S	S	S	S	S	S	S	S	S	S
Zap	016M2	S	R	S	R	S	I	S	S	I	S	S
Zap	001M1	S	R	S	S	S	I	S	S	R	S	S
Zap	002M1	S	S	S	S	S	S	S	S	S	S	S
zap	020M2	S	R	S	S	S	S	S	S	S	S	S
Zap	087M8	S	S	S	S	S	S	S	S	S	S	S
Zap	015M2	R	R	I	I	S	S	S	I	R	S	I
Zap	017M2	S	R	S	S	S	S	S	S	I	S	S
Zap	047M5	R	R	R	R	S	S	S	S	R	S	S
Zap	039M4	S	R	S	S	S	S	S	S	R	S	S
Zap	040M4	S	S	S	S	S	S	S	S	S	S	S
Zap	031M3	S	S	S	S	S	S	S	S	I	S	S
Zap	032M3	S	S	I	S	S	S	S	S	I	S	S
Zap	045M4	S	S	S	S	S	S	S	S	S	S	S
Zap	049M5	S	S	S	S	S	S	S	S	S	S	S
Zap	043M4	S	S	R	S	S	S	S	S	R	S	S
Zap	046M4	S	S	R	S	S	I	I	I	S	R	S
Zap	051M5	S	S	S	S	S	S	S	S	S	S	S
Zap	050M5	S	S	S	S	S	S	S	S	S	S	S
Zap	056M5	R	R	I	R	S	S	S	S	R	S	I
Zap	048M5	R	R	R	R	S	R	S	I	R	S	S
Zap	082M8	R	R	R	R	S	S	S	S	R	S	S
Zap	112M10	S	R	R	R	S	S	S	S	R	S	R
Zap	164M14	R	R	I	R	S	R	I	S	R	R	R
Zap	168M14	R	R	I	R	S	R	I	I	R	R	R
Zap	169M14	S	R	S	S	S	S	S	S	R	S	S
Zap	076M7	S	R	S	R	S	S	S	S	R	S	R
Zap	077M7	S	S	S	S	S	I	S	I	I	R	S
Zap	078M7	S	R	S	S	S	S	S	S	R	S	S
Zap	079M7	S	R	S	S	S	S	S	S	R	S	S
Zap	080M7	S	R	S	S	S	S	S	S	R	S	S
Zap	081M7	R	R	S	R	S	R	S	S	I	S	S
Zap	173M15	R	R	I	R	S	S	S	S	R	S	S
Zap	178M15	R	S	S	S	S	S	S	S	S	S	S
Zap	214M18	S	S	S	S	S	S	S	S	S	S	S
Zap	216M19	S	S	I	S	S	S	S	S	S	S	S
Zap	217M19	S	S	S	S	S	S	S	S	S	S	S
Zap	219M19	S	S	S	S	S	S	S	S	S	S	S
Zap	220M19	S	R	S	S	S	S	S	S	S	S	S
Zap	221M19	S	S	S	S	S	S	S	S	S	S	S
Zap	222M19	S	S	R	S	S	S	S	S	S	S	S
Zap	180M15	S	S	S	S	S	S	S	S	S	S	S
Zap	041M4	S	S	S	S	S	S	S	S	S	S	S
Zap	182M16	S	S	R	S	S	S	S	S	S	S	S
Zap	183M16	S	S	S	S	S	S	S	S	S	S	S
Zap	185M16	S	S	S	S	S	S	S	S	S	S	I
Zap	211M18	R	R	R	S	S	S	S	S	R	S	R
Zap	144M12	R	R	I	R	S	S	S	S	R	S	I
Zap	152M13	S	S	R	S	S	S	S	S	S	S	S
Zap	238M20	R	R	S	S	S	S	S	S	R	S	R
Zap	237M20	S	S	R	S	S	S	S	S	S	S	S
Zap	085M8	I	S	S	S	S	R	S	S	R	S	S
Zap	113M10	R	R	I	R	S	I	S	S	R	S	R
Zap	013M2	R	R	I	R	S	I	S	S	R	S	I
Zap	197M17	R	R	I	R	S	S	S	S	R	R	R
Zap	200M17	R	R	I	R	S	I	S	S	R	S	R
Zap	203M17	S	R	R	S	I	I	S	S	S	S	S
Zap	212M18	S	S	S	S	S	S	S	S	S	S	S
Zap	140M12	S	R	R	R	I	S	S	S	R	S	R
Zap	145M12	S	S	S	S	S	S	S	S	S	S	S
Zap	055M5	R	S	S	S	S	R	S	S	S	S	S
Zap	054M5	R	R	I	R	S	S	S	S	R	S	I
Zap	142M12	S	S	S	S	S	S	S	S	S	S	S
Zap	187M16	S	S	S	S	S	S	S	S	S	S	S
Zap	034M3	S	S	S	S	S	S	S	S	S	S	S
Zap	064M6	S	S	S	S	S	S	S	S	S	S	S
Zap	162M14	S	S	S	S	S	S	S	S	S	S	S
Zap	030M3	S	S	S	S	S	S	S	S	S	S	S
Zap	042M4	S	R	S	S	S	S	S	S	I	S	S
Zap	143M12	R	R	I	R	S	I	S	S	R	S	I
Zap	151M13	S	S	S	S	S	I	S	S	S	S	S
Zap	153M13	S	S	S	S	S	S	S	S	S	S	S
Zap	188M16	S	R	R	S	S	S	S	S	R	S	S
Zap	084M8	S	S	R	S	S	S	S	S	S	S	S
Zap	213M18	S	S	S	S	S	S	S	S	S	S	S
Zap	215M18	S	S	S	S	S	S	S	S	S	S	S
Zap	184M16	S	S	S	S	S	S	S	S	S	S	S
Zap	129M11	S	S	S	S	S	S	S	S	S	S	S
Zap	003M1	S	S	S	S	S	S	S	S	S	S	S
MUNICIPIO	CEPA	AM-INT	TE- INT	NA-INT	SXT-INT	CIP-INT	CF- INT	CRO-INT	K- INT	S- INT	GM-INT	C- INT	NOTAS

## Sheet: Resistencia (serotipos)
CEPA	MUNICIPIO	AM-INT	TE- INT	NA-INT	SXT-INT	CIP-INT	CF- INT	CRO-INT	K- INT	S- INT	GM-INT	C- INT	Resistencia	SEROTIPO
001M1	Zap	S	R	S	S	S	I	S	S	R	S	S	2	E1 MONOFÁSICA
002M1	Zap	S	S	S	S	S	S	S	S	S	S	S	0	G1
003M1	Zap	S	S	S	S	S	S	S	S	S	S	S	0	GIVE
006M1	Zap	S	R	S	S	S	S	S	S	R	S	S	2	PANAMA
008M1	Tlaq	S	S	S	S	S	R	S	S	S	S	S	1	CABBSTATT
009M1	Tlaq	S	S	S	S	S	I	S	S	I	S	S	0	G2
010M1	GDL	R	R	I	I	S	S	S	S	R	S	I	3	DERBY
011 M1	Tlaq	S	S	S	S	S	S	S	S	S	S	S	0	E1
012M1	GDL	S	S	S	S	S	S	S	S	S	S	S	0	LOCKLEAZE
013M2	Zap	R	R	I	R	S	I	S	S	R	S	I	4	SAINTPAUL
015M2	Zap	R	R	I	I	S	S	S	I	R	S	I	3	TYPHIMURIUM
016M2	Zap	S	R	S	R	S	I	S	S	I	S	S	2	E1
017M2	Zap	S	R	S	S	S	S	S	S	I	S	S	1	PANAMA
019M2	Zap	S	R	S	S	S	I	S	S	R	S	S	2	INFANTIS
020M2	zap	S	R	S	S	S	S	S	S	S	S	S	1	AGONA
021M2	Tlaq	S	S	S	S	S	S	S	S	S	S	S	0	PANAMA
024M2	GDL	R	R	S	S	S	R	S	S	R	R	R	6	TYPHIMURIUM
025M3	GDL	S	S	S	S	S	S	S	S	S	S	S	0	RISSEN
027M3	Zap	S	S	S	S	S	S	S	S	S	S	S	0	RISSEN
029M3	Zap	R	R	I	I	S	I	S	S	R	S	I	3	B
030M3	Zap	S	S	S	S	S	S	S	S	S	S	S	0	KENTUCKY
031M3	Zap	S	S	S	S	S	S	S	S	I	S	S	0	INFANTIS
032M3	Zap	S	S	I	S	S	S	S	S	I	S	S	0	TYPHIMURIUM
034M3	Zap	S	S	S	S	S	S	S	S	S	S	S	0	PANAMA
035M3	Tlaq	S	S	S	S	S	I	S	S	S	S	S	0	ANATUM
037M4	GDL	S	S	S	S	S	S	S	S	S	S	S	0	DERBY
039M4	Zap	S	R	S	S	S	S	S	S	R	S	S	2	E1 MONOFÁSICA
040M4	Zap	S	S	S	S	S	S	S	S	S	S	S	0	INFANTIS
041M4	Zap	S	S	S	S	S	S	S	S	S	S	S	0	CITOBACTER
042M4	Zap	S	R	S	S	S	S	S	S	I	S	S	1	AGONA
043M4	Zap	S	S	R	S	S	S	S	S	R	S	S	2	AGONA
045M4	Zap	S	S	S	S	S	S	S	S	S	S	S	0	AGONA
046M4	Zap	S	S	R	S	S	I	I	I	S	R	S	2	LOCKLEAZE
047M5	Zap	R	R	R	R	S	S	S	S	R	S	S	5	B
048M5	Zap	R	R	R	R	S	R	S	I	R	S	S	6	CITOBACTER
049M5	Zap	S	S	S	S	S	S	S	S	S	S	S	0	B
050M5	Zap	S	S	S	S	S	S	S	S	S	S	S	0	G2 MONOFASICA
051M5	Zap	S	S	S	S	S	S	S	S	S	S	S	0	SINSTORF
052M5	GDL	S	R	I	R	S	S	S	S	R	S	R	4	ANATUM
053M5	GDL	S	R	I	R	S	I	S	S	R	S	R	4	DERBY
054M5	Zap	R	R	I	R	S	S	S	S	R	S	I	4	B
055M5	Zap	R	S	S	S	S	R	S	S	S	S	S	2	CITOBACTER
056M5	Zap	R	R	I	R	S	S	S	S	R	S	I	4	B
057M5	Tlaq	R	R	R	R	S	S	S	S	R	S	I	5	ANATUM
058M5	Tlaq	S	R	R	S	S	I	S	S	R	S	R	4	ANATUM
064M6	Zap	S	S	S	S	S	S	S	S	S	S	S	0	B
066M6	Tlaq	S	S	S	S	S	S	S	S	S	S	S	0	SINSTORF
067M6	Tlaq	S	R	R	S	S	S	S	S	R	S	S	3	ANATUM
069M6	GDL	S	S	S	S	R	S	S	S	S	S	S	1	E1
071M7	Tlaq	S	R	R	R	I	S	S	S	R	S	R	5	TYPHIMURIUM
072M7	Tlaq	R	R	I	R	S	R	I	S	R	R	R	7	ANATUM
073M7	Tlaq	R	R	I	R	S	R	S	S	S	S	S	4	G2
076M7	Zap	S	R	S	R	S	S	S	S	R	S	R	4	SAINTPAUL
077M7	Zap	S	S	S	S	S	I	S	I	I	R	S	1	TYPHIMURIUM
078M7	Zap	S	R	S	S	S	S	S	S	R	S	S	2	INFANTIS
079M7	Zap	S	R	S	S	S	S	S	S	R	S	S	2	INFANTIS
080M7	Zap	S	R	S	S	S	S	S	S	R	S	S	2	AGONA
081M7	Zap	R	R	S	R	S	R	S	S	I	S	S	4	PROTEUS
082M8	Zap	R	R	R	R	S	S	S	S	R	S	S	5	B
084M8	Zap	S	S	R	S	S	S	S	S	S	S	S	1	TYPHIMURIUM
085M8	Zap	I	S	S	S	S	R	S	S	R	S	S	2	CITOBACTER
087M8	Zap	S	S	S	S	S	S	S	S	S	S	S	0	CITOBACTER
089M8	Tlaq	S	R	S	I	S	S	S	S	R	S	S	2	WORTHINGTON
090M8	Tlaq	S	S	S	S	S	S	S	S	S	S	S	0	ANATUM
091M8	GDL	S	S	S	S	S	S	S	S	S	S	S	0	SAINTPAUL
092M8	GDL	S	R	R	R	S	S	S	S	R	S	R	5	RISSEN
093M8	Tlaq	S	S	S	S	S	S	S	I	S	S	S	0	DERBY
112M10	Zap	S	R	R	R	S	S	S	S	R	S	R	5	TYPHIMURIUM
113M10	Zap	R	R	I	R	S	I	S	S	R	S	R	5	B
119M11	Tlaq	S	R	S	S	S	S	S	S	S	S	S	1	AGONA
129M11	Zap	S	S	S	S	S	S	S	S	S	S	S	0	AGONA
130M12	Tlaq	S	S	S	S	S	S	S	S	S	S	S	0	AZTECA
131M12	Tlaq	S	S	S	R	S	S	S	S	S	S	S	1	HAVANA
132M12	Tlaq	S	S	S	S	S	S	S	S	S	S	S	0	WORTHINGTON
134M12	GDL	S	R	R	S	S	S	S	S	R	S	S	3	DERBY
135M12	GDL	S	R	R	S	I	S	S	S	R	S	S	3	READING
136M12	GDL	S	R	S	S	S	S	S	S	R	S	R	3	B
140M12	Zap	S	R	R	R	I	S	S	S	R	S	R	5	TYPHIMURIUM
142M12	Zap	S	S	S	S	S	S	S	S	S	S	S	0	BRANDENBURG
143M12	Zap	R	R	I	R	S	I	S	S	R	S	I	4	B
144M12	Zap	R	R	I	R	S	S	S	S	R	S	I	4	BRANDENBURG
145M12	Zap	S	S	S	S	S	S	S	S	S	S	S	0	sp
146M13	GDL	S	S	S	S	S	S	S	S	S	S	S	0	RISSEN
151M13	Zap	S	S	S	S	S	I	S	S	S	S	S	0	E1 MONOFÁSICA
152M13	Zap	S	S	R	S	S	S	S	S	S	S	S	1	E1
153M13	Zap	S	S	S	S	S	S	S	S	S	S	S	0	INFANTIS
159M14	Tlaq	S	R	I	S	S	R	S	S	S	S	S	2	GIVE
161M14	Tlaq	S	S	S	S	S	I	S	S	S	S	S	0	DERBY
162M14	Zap	S	S	S	S	S	S	S	S	S	S	S	0	E1 MONOFÁSICA
164M14	Zap	R	R	I	R	S	R	I	S	R	R	R	7	ANATUM
168M14	Zap	R	R	I	R	S	R	I	I	R	R	R	7	B
169M14	Zap	S	R	S	S	S	S	S	S	R	S	S	2	INFANTIS
170M15	Tlaq	S	S	R	S	S	S	S	S	S	S	R	2	ANATUM
171M15	Tlaq	S	S	S	S	S	S	S	S	S	S	S	0	MUENSTER
172M15	Tlaq	S	S	S	S	S	S	S	S	S	I	S	0	E1 MONOFÁSICA
173M15	Zap	R	R	I	R	S	S	S	S	R	S	S	4	AGONA
178M15	Zap	R	S	S	S	S	S	S	S	S	S	S	1	ADELAIDE
180M15	Zap	S	S	S	S	S	S	S	S	S	S	S	0	INFANTIS
181M16	GDL	S	S	S	S	S	S	S	S	S	S	S	0	BREDENEY
182M16	Zap	S	S	R	S	S	S	S	S	S	S	S	1	B
183M16	Zap	S	S	S	S	S	S	S	S	S	S	S	0	BRAENDERUP
184M16	Zap	S	S	S	S	S	S	S	S	S	S	S	0	E1
185M16	Zap	S	S	S	S	S	S	S	S	S	S	I	0	B
187M16	Zap	S	S	S	S	S	S	S	S	S	S	S	0	BRAENDERUP
188M16	Zap	S	R	R	S	S	S	S	S	R	S	S	3	SAINTPAUL
189M16	Tlaq	S	S	S	S	S	S	S	S	S	S	S	0	HAVANA
190M16	Tlaq	S	S	S	S	S	S	S	S	S	S	S	0	C1
191M16	Tlaq	S	R	S	R	S	I	S	S	R	S	S	3	HAVANA
192M17	GDL	S	S	S	S	S	S	S	S	I	S	R	1	BRANDENBURG
193M17	Tlaq	S	S	S	S	S	S	S	S	S	S	S	0	MONTEVIDEO
194M17	Tlaq	S	S	S	S	S	S	S	S	S	S	S	0	HAVANA
195M17	Tlaq	R	R	R	R	S	I	S	S	R	S	I	5	DERBY
197M17	Zap	R	R	I	R	S	S	S	S	R	R	R	6	PANAMA
200M17	Zap	R	R	I	R	S	I	S	S	R	S	R	5	SINSTORF
203M17	Zap	S	R	R	S	I	I	S	S	S	S	S	2	BRANDENBURG
206M18	Tlaq	S	R	S	S	S	S	S	S	S	S	S	1	18
207M18	Tlaq	S	S	R	S	S	S	S	S	S	S	S	1	E1
208M18	Tlaq	S	S	S	S	S	S	S	S	S	S	S	0	HAVANA
211M18	Zap	R	R	R	S	S	S	S	S	R	S	R	5	GIVE
212M18	Zap	S	S	S	S	S	S	S	S	S	S	S	0	E1 MONOFÁSICA
213M18	Zap	S	S	S	S	S	S	S	S	S	S	S	0	SINSTORF
214M18	Zap	S	S	S	S	S	S	S	S	S	S	S	0	SINSTORF
215M18	Zap	S	S	S	S	S	S	S	S	S	S	S	0	INFANTIS
216M19	Zap	S	S	I	S	S	S	S	S	S	S	S	0	E1 MONOFÁSICA
217M19	Zap	S	S	S	S	S	S	S	S	S	S	S	0	HAVANA
219M19	Zap	S	S	S	S	S	S	S	S	S	S	S	0	E1 MONOFÁSICA
220M19	Zap	S	R	S	S	S	S	S	S	S	S	S	1	GIVE
221M19	Zap	S	S	S	S	S	S	S	S	S	S	S	0	ANATUM
222M19	Zap	S	S	R	S	S	S	S	S	S	S	S	1	ALBANY
223M19	Tlaq	S	S	S	S	S	S	S	S	S	S	S	0	HAVANA
225M19	Tlaq	S	S	R	S	S	S	S	S	I	S	S	1	ALBANY
226M19	Tlaq	S	S	S	S	S	S	S	S	S	S	S	0	ANATUM
228M20	Tlaq	S	S	I	S	S	S	S	S	S	S	S	0	AGONA
229M20	Tlaq	S	S	S	S	S	S	S	S	S	S	S	0	KENTUCKY
230M20	Tlaq	S	S	S	S	S	S	S	S	S	S	S	0	MUENCHEN
231M20	Tlaq	S	S	S	S	S	I	S	S	S	S	S	0	SINSTORF
232M20	Tlaq	S	S	R	S	S	S	S	S	R	S	S	2	C1
235M20	Tlaq	S	S	S	R	S	S	S	S	R	S	S	2	HAVANA
236M20	Tlaq	S	S	S	S	S	S	S	S	S	S	S	0	ANATUM
237M20	Zap	S	S	R	S	S	S	S	S	S	S	S	1	BREDENEY
238M20	Zap	R	R	S	S	S	S	S	S	R	S	R	4	sp
CEPA	MUNICIPIO	AM-INT	TE- INT	NA-INT	SXT-INT	CIP-INT	CF- INT	CRO-INT	K- INT	S- INT	GM-INT	C- INT	NOTAS	NOTAS

## Sheet: Multirresistencia (orden)
Resistencia	CEPA	MUNICIPIO	SEROTIPO	AM-INT	TE- INT	NA-INT	SXT-INT	CIP-INT	CF- INT	CRO-INT	K- INT	S- INT	GM-INT	C- INT	Resistencia
7	072M7	Tlaq	ANATUM	R	R	I	R	S	R	I	S	R	R	R	7
7	164M14	Zap	ANATUM	R	R	I	R	S	R	I	S	R	R	R	7
7	168M14	Zap	B	R	R	I	R	S	R	I	I	R	R	R	7
6	024M2	GDL	TYPHIMURIUM	R	R	S	S	S	R	S	S	R	R	R	6
6	197M17	Zap	PANAMA	R	R	I	R	S	S	S	S	R	R	R	6
5	047M5	Zap	B	R	R	R	R	S	S	S	S	R	S	S	5
5	057M5	Tlaq	ANATUM	R	R	R	R	S	S	S	S	R	S	I	5
5	071M7	Tlaq	TYPHIMURIUM	S	R	R	R	I	S	S	S	R	S	R	5
5	082M8	Zap	B	R	R	R	R	S	S	S	S	R	S	S	5
5	092M8	GDL	RISSEN	S	R	R	R	S	S	S	S	R	S	R	5
5	112M10	Zap	TYPHIMURIUM	S	R	R	R	S	S	S	S	R	S	R	5
5	113M10	Zap	B	R	R	I	R	S	I	S	S	R	S	R	5
5	140M12	Zap	TYPHIMURIUM	S	R	R	R	I	S	S	S	R	S	R	5
5	195M17	Tlaq	DERBY	R	R	R	R	S	I	S	S	R	S	I	5
5	200M17	Zap	SINSTORF	R	R	I	R	S	I	S	S	R	S	R	5
5	211M18	Zap	GIVE	R	R	R	S	S	S	S	S	R	S	R	5
4	013M2	Zap	SAINTPAUL	R	R	I	R	S	I	S	S	R	S	I	4
4	052M5	GDL	ANATUM	S	R	I	R	S	S	S	S	R	S	R	4
4	053M5	GDL	DERBY	S	R	I	R	S	I	S	S	R	S	R	4
4	054M5	Zap	B	R	R	I	R	S	S	S	S	R	S	I	4
4	056M5	Zap	B	R	R	I	R	S	S	S	S	R	S	I	4
4	058M5	Tlaq	ANATUM	S	R	R	S	S	I	S	S	R	S	R	4
4	073M7	Tlaq	G2	R	R	I	R	S	R	S	S	S	S	S	4
4	076M7	Zap	SAINTPAUL	S	R	S	R	S	S	S	S	R	S	R	4
4	143M12	Zap	B	R	R	I	R	S	I	S	S	R	S	I	4
4	144M12	Zap	BRANDENBURG	R	R	I	R	S	S	S	S	R	S	I	4
4	173M15	Zap	AGONA	R	R	I	R	S	S	S	S	R	S	S	4
4	238M20	Zap	sp	R	R	S	S	S	S	S	S	R	S	R	4
3	010M1	GDL	DERBY	R	R	I	I	S	S	S	S	R	S	I	3
3	015M2	Zap	TYPHIMURIUM	R	R	I	I	S	S	S	I	R	S	I	3
3	029M3	Zap	B	R	R	I	I	S	I	S	S	R	S	I	3
3	067M6	Tlaq	ANATUM	S	R	R	S	S	S	S	S	R	S	S	3
3	134M12	GDL	DERBY	S	R	R	S	S	S	S	S	R	S	S	3
3	135M12	GDL	READING	S	R	R	S	I	S	S	S	R	S	S	3
3	136M12	GDL	B	S	R	S	S	S	S	S	S	R	S	R	3
3	188M16	Zap	SAINTPAUL	S	R	R	S	S	S	S	S	R	S	S	3
3	191M16	Tlaq	HAVANA	S	R	S	R	S	I	S	S	R	S	S	3
2	001M1	Zap	E1 MONOFÁSICA	S	R	S	S	S	I	S	S	R	S	S	2
2	006M1	Zap	PANAMA	S	R	S	S	S	S	S	S	R	S	S	2
2	016M2	Zap	E1	S	R	S	R	S	I	S	S	I	S	S	2
2	019M2	Zap	INFANTIS	S	R	S	S	S	I	S	S	R	S	S	2
2	039M4	Zap	E1 MONOFÁSICA	S	R	S	S	S	S	S	S	R	S	S	2
2	043M4	Zap	AGONA	S	S	R	S	S	S	S	S	R	S	S	2
2	046M4	Zap	LOCKLEAZE	S	S	R	S	S	I	I	I	S	R	S	2
2	078M7	Zap	INFANTIS	S	R	S	S	S	S	S	S	R	S	S	2
2	079M7	Zap	INFANTIS	S	R	S	S	S	S	S	S	R	S	S	2
2	080M7	Zap	AGONA	S	R	S	S	S	S	S	S	R	S	S	2
2	089M8	Tlaq	WORTHINGTON	S	R	S	I	S	S	S	S	R	S	S	2
2	159M14	Tlaq	GIVE	S	R	I	S	S	R	S	S	S	S	S	2
2	169M14	Zap	INFANTIS	S	R	S	S	S	S	S	S	R	S	S	2
2	170M15	Tlaq	ANATUM	S	S	R	S	S	S	S	S	S	S	R	2
2	203M17	Zap	BRANDENBURG	S	R	R	S	I	I	S	S	S	S	S	2
2	232M20	Tlaq	C1	S	S	R	S	S	S	S	S	R	S	S	2
2	235M20	Tlaq	HAVANA	S	S	S	R	S	S	S	S	R	S	S	2
1	008M1	Tlaq	CABBSTATT	S	S	S	S	S	R	S	S	S	S	S	1
1	017M2	Zap	PANAMA	S	R	S	S	S	S	S	S	I	S	S	1
1	020M2	zap	AGONA	S	R	S	S	S	S	S	S	S	S	S	1
1	042M4	Zap	AGONA	S	R	S	S	S	S	S	S	I	S	S	1
1	069M6	GDL	E1	S	S	S	S	R	S	S	S	S	S	S	1
1	077M7	Zap	TYPHIMURIUM	S	S	S	S	S	I	S	I	I	R	S	1
1	084M8	Zap	TYPHIMURIUM	S	S	R	S	S	S	S	S	S	S	S	1
1	119M11	Tlaq	AGONA	S	R	S	S	S	S	S	S	S	S	S	1
1	131M12	Tlaq	HAVANA	S	S	S	R	S	S	S	S	S	S	S	1
1	152M13	Zap	E1	S	S	R	S	S	S	S	S	S	S	S	1
1	178M15	Zap	ADELAIDE	R	S	S	S	S	S	S	S	S	S	S	1
1	182M16	Zap	B	S	S	R	S	S	S	S	S	S	S	S	1
1	192M17	GDL	BRANDENBURG	S	S	S	S	S	S	S	S	I	S	R	1
1	206M18	Tlaq	18	S	R	S	S	S	S	S	S	S	S	S	1
1	207M18	Tlaq	E1	S	S	R	S	S	S	S	S	S	S	S	1
1	220M19	Zap	GIVE	S	R	S	S	S	S	S	S	S	S	S	1
1	222M19	Zap	ALBANY	S	S	R	S	S	S	S	S	S	S	S	1
1	225M19	Tlaq	ALBANY	S	S	R	S	S	S	S	S	I	S	S	1
1	237M20	Zap	BREDENEY	S	S	R	S	S	S	S	S	S	S	S	1
0	002M1	Zap	G1	S	S	S	S	S	S	S	S	S	S	S	0
0	003M1	Zap	GIVE	S	S	S	S	S	S	S	S	S	S	S	0
0	009M1	Tlaq	G2	S	S	S	S	S	I	S	S	I	S	S	0
0	011 M1	Tlaq	E1	S	S	S	S	S	S	S	S	S	S	S	0
0	012M1	GDL	LOCKLEAZE	S	S	S	S	S	S	S	S	S	S	S	0
0	021M2	Tlaq	PANAMA	S	S	S	S	S	S	S	S	S	S	S	0
0	025M3	GDL	RISSEN	S	S	S	S	S	S	S	S	S	S	S	0
0	027M3	Zap	RISSEN	S	S	S	S	S	S	S	S	S	S	S	0
0	030M3	Zap	KENTUCKY	S	S	S	S	S	S	S	S	S	S	S	0
0	031M3	Zap	INFANTIS	S	S	S	S	S	S	S	S	I	S	S	0
0	032M3	Zap	TYPHIMURIUM	S	S	I	S	S	S	S	S	I	S	S	0
0	034M3	Zap	PANAMA	S	S	S	S	S	S	S	S	S	S	S	0
0	035M3	Tlaq	ANATUM	S	S	S	S	S	I	S	S	S	S	S	0
0	037M4	GDL	DERBY	S	S	S	S	S	S	S	S	S	S	S	0
0	040M4	Zap	INFANTIS	S	S	S	S	S	S	S	S	S	S	S	0
0	045M4	Zap	AGONA	S	S	S	S	S	S	S	S	S	S	S	0
0	049M5	Zap	B	S	S	S	S	S	S	S	S	S	S	S	0
0	050M5	Zap	G2 MONOFASICA	S	S	S	S	S	S	S	S	S	S	S	0
0	051M5	Zap	SINSTORF	S	S	S	S	S	S	S	S	S	S	S	0
0	064M6	Zap	B	S	S	S	S	S	S	S	S	S	S	S	0
0	066M6	Tlaq	SINSTORF	S	S	S	S	S	S	S	S	S	S	S	0
0	090M8	Tlaq	ANATUM	S	S	S	S	S	S	S	S	S	S	S	0
0	091M8	GDL	SAINTPAUL	S	S	S	S	S	S	S	S	S	S	S	0
0	093M8	Tlaq	DERBY	S	S	S	S	S	S	S	I	S	S	S	0
0	129M11	Zap	AGONA	S	S	S	S	S	S	S	S	S	S	S	0
0	130M12	Tlaq	AZTECA	S	S	S	S	S	S	S	S	S	S	S	0
0	132M12	Tlaq	WORTHINGTON	S	S	S	S	S	S	S	S	S	S	S	0
0	142M12	Zap	BRANDENBURG	S	S	S	S	S	S	S	S	S	S	S	0
0	145M12	Zap	sp	S	S	S	S	S	S	S	S	S	S	S	0
0	146M13	GDL	RISSEN	S	S	S	S	S	S	S	S	S	S	S	0
0	151M13	Zap	E1 MONOFÁSICA	S	S	S	S	S	I	S	S	S	S	S	0
0	153M13	Zap	INFANTIS	S	S	S	S	S	S	S	S	S	S	S	0
0	161M14	Tlaq	DERBY	S	S	S	S	S	I	S	S	S	S	S	0
0	162M14	Zap	E1 MONOFÁSICA	S	S	S	S	S	S	S	S	S	S	S	0
0	171M15	Tlaq	MUENSTER	S	S	S	S	S	S	S	S	S	S	S	0
0	172M15	Tlaq	E1 MONOFÁSICA	S	S	S	S	S	S	S	S	S	I	S	0
0	180M15	Zap	INFANTIS	S	S	S	S	S	S	S	S	S	S	S	0
0	181M16	GDL	BREDENEY	S	S	S	S	S	S	S	S	S	S	S	0
0	183M16	Zap	BRAENDERUP	S	S	S	S	S	S	S	S	S	S	S	0
0	184M16	Zap	E1	S	S	S	S	S	S	S	S	S	S	S	0
0	185M16	Zap	B	S	S	S	S	S	S	S	S	S	S	I	0
0	187M16	Zap	BRAENDERUP	S	S	S	S	S	S	S	S	S	S	S	0
0	189M16	Tlaq	HAVANA	S	S	S	S	S	S	S	S	S	S	S	0
0	190M16	Tlaq	C1	S	S	S	S	S	S	S	S	S	S	S	0
0	193M17	Tlaq	MONTEVIDEO	S	S	S	S	S	S	S	S	S	S	S	0
0	194M17	Tlaq	HAVANA	S	S	S	S	S	S	S	S	S	S	S	0
0	208M18	Tlaq	HAVANA	S	S	S	S	S	S	S	S	S	S	S	0
0	212M18	Zap	E1 MONOFÁSICA	S	S	S	S	S	S	S	S	S	S	S	0
0	213M18	Zap	SINSTORF	S	S	S	S	S	S	S	S	S	S	S	0
0	214M18	Zap	SINSTORF	S	S	S	S	S	S	S	S	S	S	S	0
0	215M18	Zap	INFANTIS	S	S	S	S	S	S	S	S	S	S	S	0
0	216M19	Zap	E1 MONOFÁSICA	S	S	I	S	S	S	S	S	S	S	S	0
0	217M19	Zap	HAVANA	S	S	S	S	S	S	S	S	S	S	S	0
0	219M19	Zap	E1 MONOFÁSICA	S	S	S	S	S	S	S	S	S	S	S	0
0	221M19	Zap	ANATUM	S	S	S	S	S	S	S	S	S	S	S	0
0	223M19	Tlaq	HAVANA	S	S	S	S	S	S	S	S	S	S	S	0
0	226M19	Tlaq	ANATUM	S	S	S	S	S	S	S	S	S	S	S	0
0	228M20	Tlaq	AGONA	S	S	I	S	S	S	S	S	S	S	S	0
0	229M20	Tlaq	KENTUCKY	S	S	S	S	S	S	S	S	S	S	S	0
0	230M20	Tlaq	MUENCHEN	S	S	S	S	S	S	S	S	S	S	S	0
0	231M20	Tlaq	SINSTORF	S	S	S	S	S	I	S	S	S	S	S	0
0	236M20	Tlaq	ANATUM	S	S	S	S	S	S	S	S	S	S	S	0
Resistencia	CEPA	MUNICIPIO	SEROTIPO	AM-INT	TE- INT	NA-INT	SXT-INT	CIP-INT	CF- INT	CRO-INT	K- INT	S- INT	GM-INT	C- INT	Resistencia

## Sheet: Multirresistencia (perfiles)
Resistencia	CEPA	MUNICIPIO	SEROTIPO	AM-INT	TE- INT	NA-INT	SXT-INT	CIP-INT	CF- INT	CRO-INT	K- INT	S- INT	GM-INT	C- INT	Resistencia	Perfil de antibióticos resistentes
7	072M7	Tlaq	ANATUM	R	R	I	R	S	R	I	S	R	R	R	7	AM, TE, SXT,CF, S, GM, C
7	164M14	Zap	ANATUM	R	R	I	R	S	R	I	S	R	R	R	7	AM, TE, SXT, CF, S, GM, C
7	168M14	Zap	B	R	R	I	R	S	R	I	I	R	R	R	7	AM, TE, SXT, CF, S, GM, C
6	024M2	GDL	TYPHIMURIUM	R	R	S	S	S	R	S	S	R	R	R	6	AM, TE, CF, S, GM, C
6	197M17	Zap	PANAMA	R	R	I	R	S	S	S	S	R	R	R	6	AM, TE, SXT, S, GM, C
5	047M5	Zap	B	R	R	R	R	S	S	S	S	R	S	S	5	AM, TE, NA, SXT, S
5	057M5	Tlaq	ANATUM	R	R	R	R	S	S	S	S	R	S	I	5	AM, TE, NA, SXT, S
5	071M7	Tlaq	TYPHIMURIUM	S	R	R	R	I	S	S	S	R	S	R	5	TE, NA, SXT, S, C
5	082M8	Zap	B	R	R	R	R	S	S	S	S	R	S	S	5	AM, TE, NA, SXT, S
5	092M8	GDL	RISSEN	S	R	R	R	S	S	S	S	R	S	R	5	TE, NA, SXT, S, C
5	112M10	Zap	TYPHIMURIUM	S	R	R	R	S	S	S	S	R	S	R	5	TE, NA, SXT, S, C
5	113M10	Zap	B	R	R	I	R	S	I	S	S	R	S	R	5	AM, TE, SXT, S, C
5	140M12	Zap	TYPHIMURIUM	S	R	R	R	I	S	S	S	R	S	R	5	TE, NA, SXT, S, C
5	195M17	Tlaq	DERBY	R	R	R	R	S	I	S	S	R	S	I	5	AM, TE, NA, SXT, S
5	200M17	Zap	SINSTORF	R	R	I	R	S	I	S	S	R	S	R	5	AM, TE, SXT, S, C
5	211M18	Zap	GIVE	R	R	R	S	S	S	S	S	R	S	R	5	AM, TE, NA, S, C
4	013M2	Zap	SAINTPAUL	R	R	I	R	S	I	S	S	R	S	I	4	AM, TE, SXT, S
4	052M5	GDL	ANATUM	S	R	I	R	S	S	S	S	R	S	R	4	TE, SXT, S, C
4	053M5	GDL	DERBY	S	R	I	R	S	I	S	S	R	S	R	4	TE, SXT, S, C
4	054M5	Zap	B	R	R	I	R	S	S	S	S	R	S	I	4	AM, TE, SXT, S
4	056M5	Zap	B	R	R	I	R	S	S	S	S	R	S	I	4	AM, TE, SXT, S
4	058M5	Tlaq	ANATUM	S	R	R	S	S	I	S	S	R	S	R	4	TE, NA, S, C
4	073M7	Tlaq	G2	R	R	I	R	S	R	S	S	S	S	S	4	AM, TE, SXT, CF
4	076M7	Zap	SAINTPAUL	S	R	S	R	S	S	S	S	R	S	R	4	TE, SXT, S, C
4	143M12	Zap	B	R	R	I	R	S	I	S	S	R	S	I	4	AM, TE, SXT, S
4	144M12	Zap	BRANDENBURG	R	R	I	R	S	S	S	S	R	S	I	4	AM, TE, SXT, S
4	173M15	Zap	AGONA	R	R	I	R	S	S	S	S	R	S	S	4	AM, TE, SXT, S
4	238M20	Zap	sp	R	R	S	S	S	S	S	S	R	S	R	4	AM, TE, S, C
3	010M1	GDL	DERBY	R	R	I	I	S	S	S	S	R	S	I	3	AM, TE, S
3	015M2	Zap	TYPHIMURIUM	R	R	I	I	S	S	S	I	R	S	I	3	AM, TE, S
3	029M3	Zap	B	R	R	I	I	S	I	S	S	R	S	I	3	AM, TE, S
3	067M6	Tlaq	ANATUM	S	R	R	S	S	S	S	S	R	S	S	3	TE, NA, S
3	134M12	GDL	DERBY	S	R	R	S	S	S	S	S	R	S	S	3	TE, NA, S
3	135M12	GDL	READING	S	R	R	S	I	S	S	S	R	S	S	3	TE, NA, S
3	136M12	GDL	B	S	R	S	S	S	S	S	S	R	S	R	3	TE, S, C
3	188M16	Zap	SAINTPAUL	S	R	R	S	S	S	S	S	R	S	S	3	TE, NA, S
3	191M16	Tlaq	HAVANA	S	R	S	R	S	I	S	S	R	S	S	3	TE, SXT, S
2	001M1	Zap	E1 MONOFÁSICA	S	R	S	S	S	I	S	S	R	S	S	2
2	006M1	Zap	PANAMA	S	R	S	S	S	S	S	S	R	S	S	2
2	016M2	Zap	E1	S	R	S	R	S	I	S	S	I	S	S	2
2	019M2	Zap	INFANTIS	S	R	S	S	S	I	S	S	R	S	S	2
2	039M4	Zap	E1 MONOFÁSICA	S	R	S	S	S	S	S	S	R	S	S	2
2	043M4	Zap	AGONA	S	S	R	S	S	S	S	S	R	S	S	2
2	046M4	Zap	LOCKLEAZE	S	S	R	S	S	I	I	I	S	R	S	2
2	078M7	Zap	INFANTIS	S	R	S	S	S	S	S	S	R	S	S	2
2	079M7	Zap	INFANTIS	S	R	S	S	S	S	S	S	R	S	S	2
2	080M7	Zap	AGONA	S	R	S	S	S	S	S	S	R	S	S	2
2	089M8	Tlaq	WORTHINGTON	S	R	S	I	S	S	S	S	R	S	S	2
2	159M14	Tlaq	GIVE	S	R	I	S	S	R	S	S	S	S	S	2
2	169M14	Zap	INFANTIS	S	R	S	S	S	S	S	S	R	S	S	2
2	170M15	Tlaq	ANATUM	S	S	R	S	S	S	S	S	S	S	R	2
2	203M17	Zap	BRANDENBURG	S	R	R	S	I	I	S	S	S	S	S	2
2	232M20	Tlaq	C1	S	S	R	S	S	S	S	S	R	S	S	2
2	235M20	Tlaq	HAVANA	S	S	S	R	S	S	S	S	R	S	S	2
1	008M1	Tlaq	CABBSTATT	S	S	S	S	S	R	S	S	S	S	S	1
1	017M2	Zap	PANAMA	S	R	S	S	S	S	S	S	I	S	S	1
1	020M2	zap	AGONA	S	R	S	S	S	S	S	S	S	S	S	1
1	042M4	Zap	AGONA	S	R	S	S	S	S	S	S	I	S	S	1
1	069M6	GDL	E1	S	S	S	S	R	S	S	S	S	S	S	1
1	077M7	Zap	TYPHIMURIUM	S	S	S	S	S	I	S	I	I	R	S	1
1	084M8	Zap	TYPHIMURIUM	S	S	R	S	S	S	S	S	S	S	S	1
1	119M11	Tlaq	AGONA	S	R	S	S	S	S	S	S	S	S	S	1
1	131M12	Tlaq	HAVANA	S	S	S	R	S	S	S	S	S	S	S	1
1	152M13	Zap	E1	S	S	R	S	S	S	S	S	S	S	S	1
1	178M15	Zap	ADELAIDE	R	S	S	S	S	S	S	S	S	S	S	1
1	182M16	Zap	B	S	S	R	S	S	S	S	S	S	S	S	1
1	192M17	GDL	BRANDENBURG	S	S	S	S	S	S	S	S	I	S	R	1
1	206M18	Tlaq	18	S	R	S	S	S	S	S	S	S	S	S	1
1	207M18	Tlaq	E1	S	S	R	S	S	S	S	S	S	S	S	1
1	220M19	Zap	GIVE	S	R	S	S	S	S	S	S	S	S	S	1
1	222M19	Zap	ALBANY	S	S	R	S	S	S	S	S	S	S	S	1
1	225M19	Tlaq	ALBANY	S	S	R	S	S	S	S	S	I	S	S	1
1	237M20	Zap	BREDENEY	S	S	R	S	S	S	S	S	S	S	S	1
0	002M1	Zap	G1	S	S	S	S	S	S	S	S	S	S	S	0
0	003M1	Zap	GIVE	S	S	S	S	S	S	S	S	S	S	S	0
0	009M1	Tlaq	G2	S	S	S	S	S	I	S	S	I	S	S	0
0	011 M1	Tlaq	E1	S	S	S	S	S	S	S	S	S	S	S	0
0	012M1	GDL	LOCKLEAZE	S	S	S	S	S	S	S	S	S	S	S	0
0	021M2	Tlaq	PANAMA	S	S	S	S	S	S	S	S	S	S	S	0
0	025M3	GDL	RISSEN	S	S	S	S	S	S	S	S	S	S	S	0
0	027M3	Zap	RISSEN	S	S	S	S	S	S	S	S	S	S	S	0
0	030M3	Zap	KENTUCKY	S	S	S	S	S	S	S	S	S	S	S	0
0	031M3	Zap	INFANTIS	S	S	S	S	S	S	S	S	I	S	S	0
0	032M3	Zap	TYPHIMURIUM	S	S	I	S	S	S	S	S	I	S	S	0
0	034M3	Zap	PANAMA	S	S	S	S	S	S	S	S	S	S	S	0
0	035M3	Tlaq	ANATUM	S	S	S	S	S	I	S	S	S	S	S	0
0	037M4	GDL	DERBY	S	S	S	S	S	S	S	S	S	S	S	0
0	040M4	Zap	INFANTIS	S	S	S	S	S	S	S	S	S	S	S	0
0	045M4	Zap	AGONA	S	S	S	S	S	S	S	S	S	S	S	0
0	049M5	Zap	B	S	S	S	S	S	S	S	S	S	S	S	0
0	050M5	Zap	G2 MONOFASICA	S	S	S	S	S	S	S	S	S	S	S	0
0	051M5	Zap	SINSTORF	S	S	S	S	S	S	S	S	S	S	S	0
0	064M6	Zap	B	S	S	S	S	S	S	S	S	S	S	S	0
0	066M6	Tlaq	SINSTORF	S	S	S	S	S	S	S	S	S	S	S	0
0	090M8	Tlaq	ANATUM	S	S	S	S	S	S	S	S	S	S	S	0
0	091M8	GDL	SAINTPAUL	S	S	S	S	S	S	S	S	S	S	S	0
0	093M8	Tlaq	DERBY	S	S	S	S	S	S	S	I	S	S	S	0
0	129M11	Zap	AGONA	S	S	S	S	S	S	S	S	S	S	S	0
0	130M12	Tlaq	AZTECA	S	S	S	S	S	S	S	S	S	S	S	0
0	132M12	Tlaq	WORTHINGTON	S	S	S	S	S	S	S	S	S	S	S	0
0	142M12	Zap	BRANDENBURG	S	S	S	S	S	S	S	S	S	S	S	0
0	145M12	Zap	sp	S	S	S	S	S	S	S	S	S	S	S	0
0	146M13	GDL	RISSEN	S	S	S	S	S	S	S	S	S	S	S	0
0	151M13	Zap	E1 MONOFÁSICA	S	S	S	S	S	I	S	S	S	S	S	0
0	153M13	Zap	INFANTIS	S	S	S	S	S	S	S	S	S	S	S	0
0	161M14	Tlaq	DERBY	S	S	S	S	S	I	S	S	S	S	S	0
0	162M14	Zap	E1 MONOFÁSICA	S	S	S	S	S	S	S	S	S	S	S	0
0	171M15	Tlaq	MUENSTER	S	S	S	S	S	S	S	S	S	S	S	0
0	172M15	Tlaq	E1 MONOFÁSICA	S	S	S	S	S	S	S	S	S	I	S	0
0	180M15	Zap	INFANTIS	S	S	S	S	S	S	S	S	S	S	S	0
0	181M16	GDL	BREDENEY	S	S	S	S	S	S	S	S	S	S	S	0
0	183M16	Zap	BRAENDERUP	S	S	S	S	S	S	S	S	S	S	S	0
0	184M16	Zap	E1	S	S	S	S	S	S	S	S	S	S	S	0
0	185M16	Zap	B	S	S	S	S	S	S	S	S	S	S	I	0
0	187M16	Zap	BRAENDERUP	S	S	S	S	S	S	S	S	S	S	S	0
0	189M16	Tlaq	HAVANA	S	S	S	S	S	S	S	S	S	S	S	0
0	190M16	Tlaq	C1	S	S	S	S	S	S	S	S	S	S	S	0
0	193M17	Tlaq	MONTEVIDEO	S	S	S	S	S	S	S	S	S	S	S	0
0	194M17	Tlaq	HAVANA	S	S	S	S	S	S	S	S	S	S	S	0
0	208M18	Tlaq	HAVANA	S	S	S	S	S	S	S	S	S	S	S	0
0	212M18	Zap	E1 MONOFÁSICA	S	S	S	S	S	S	S	S	S	S	S	0
0	213M18	Zap	SINSTORF	S	S	S	S	S	S	S	S	S	S	S	0
0	214M18	Zap	SINSTORF	S	S	S	S	S	S	S	S	S	S	S	0
0	215M18	Zap	INFANTIS	S	S	S	S	S	S	S	S	S	S	S	0
0	216M19	Zap	E1 MONOFÁSICA	S	S	I	S	S	S	S	S	S	S	S	0
0	217M19	Zap	HAVANA	S	S	S	S	S	S	S	S	S	S	S	0
0	219M19	Zap	E1 MONOFÁSICA	S	S	S	S	S	S	S	S	S	S	S	0
0	221M19	Zap	ANATUM	S	S	S	S	S	S	S	S	S	S	S	0
0	223M19	Tlaq	HAVANA	S	S	S	S	S	S	S	S	S	S	S	0
0	226M19	Tlaq	ANATUM	S	S	S	S	S	S	S	S	S	S	S	0
0	228M20	Tlaq	AGONA	S	S	I	S	S	S	S	S	S	S	S	0
0	229M20	Tlaq	KENTUCKY	S	S	S	S	S	S	S	S	S	S	S	0
0	230M20	Tlaq	MUENCHEN	S	S	S	S	S	S	S	S	S	S	S	0
0	231M20	Tlaq	SINSTORF	S	S	S	S	S	I	S	S	S	S	S	0
0	236M20	Tlaq	ANATUM	S	S	S	S	S	S	S	S	S	S	S	0
Resistencia	CEPA	MUNICIPIO	SEROTIPO	AM-INT	TE- INT	NA-INT	SXT-INT	CIP-INT	CF- INT	CRO-INT	K- INT	S- INT	GM-INT	C- INT	Resistencia
																Antibióticos resistentes
